# Supplementary material for: Hydroamination of terminal alkynes with secondary amines catalyzed by copper: regioselective access to amines
Source: Royal Society of Chemistry journal article supplement (doi:10.1039/c5cc02677f), 2015-01-01

## Supporting Information:

# Hydroamination of Terminal Alkynes with Secondary Amines Catalyzed by Copper: Regioselective Access to Amines

Janet Bahri,<sup>a,b</sup> Rémi Blicq,<sup>a</sup> Bassem Jamoussi,<sup>b</sup> Marc Taillefer<sup>\*a</sup> and Florian Monnier<sup>\*a</sup>

<sup>a</sup> École Nationale Supérieure de Chimie de Montpellier,  
Institut Charles Gerhardt Montpellier CNRS UMR 5253, AM2N  
8 rue de l'École Normale 34296 Montpellier Cedex 05, France

<sup>b</sup> *Laboratoire de Chimie, Institut Supérieur d'Éducation et de Formation Continue, 43 Rue de la Liberté, 2019, Le Bardo, Tunisia.*

*florian.monnier@enscm.fr ; marc.taillefer@enscm.fr*

|                                                                                         |        |
|-----------------------------------------------------------------------------------------|--------|
| I- General experimental methods                                                         | S1-S2  |
| II- Typical procedures for the preparation of compounds <b>3a-3w</b> and <b>7a-7w</b> : | S2-S3  |
| III- Characterization of compounds <b>7a-7w</b>                                         | S4-S38 |

### **I. General considerations**

All reactions were performed in oven-dried 45x14.75 mm Screw tubes under an atmosphere of argon. N-methyl-2-pyrrolidone (NMP) was distilled from P<sub>2</sub>O<sub>5</sub> and stored over activated 3 Å molecular sieves under an argon atmosphere. CuCN stored in a dessicator cabinet and

weighed to air. All reagents (alkynes and amines) were purchased from either Sigma-Aldrich® or Alfa Aesar® or Acros Organic®. All reagents were weighed in the air.

<sup>1</sup>H and <sup>13</sup>C NMR spectra were recorded with a Bruker AC-400 MHz spectrometer in CDCl<sub>3</sub>. For <sup>1</sup>H NMR (400 MHz), CHCl<sub>3</sub> and TMS served as internal standards ( $\delta = 7.27$  and  $\delta = 0$  ppm) and data are reported as follows: chemical shift (in ppm), multiplicity (s = singlet, d = doublet, t = triplet, m = multiplet), coupling constant (in Hz), and integration. For <sup>13</sup>C NMR (100 MHz), CHCl<sub>3</sub> was used as internal standards ( $\delta = 77.2$  ppm) and spectra were obtained with complete proton decoupling. Gas chromatography–mass spectra (GC-MS) were recorded on a Shimadzu QP2012-SE with a Zebron ZB-5MS (20m × 0,18mm), capillary apolar column (Stationary phase: 0.18 $\mu$ m film). GC-MS method: Initial temperature: 50 °C; Initial time: 2 min; Ramp: 2 °C/min until 50 °C then 10 °C/min; Final Temperature: 280 °C; Final time: 15 min. Melting points (mp) were carried out on a Büchi B-540 melting point apparatus, and are uncorrected. HRMS (Q-TOF) were performed on a JEOL JMS-DX300 spectrometer (3 keV, xenon) in a m-nitrobenzylalcohol matrix.

## II. General procedure for hydroamination of alkynes with amines

After standard cycles of evacuation and back-filling with dry and pure nitrogen, an oven-dried Screw tubes equipped with a magnetic stirring bar was charged with CuCN (0.15 mmol, 15 mol %) and the alkyne if a solid (1 mmol, 1 equiv). The tube was evacuated, back-filled with nitrogen. If a liquid, the alkyne was added under a stream of nitrogen by syringe at room temperature (1 mmol, 1 equiv) followed by the amine (5 mmol, 5 equiv) which can play, in the same time, the role of solvent or we can added the solvent NMP (1.0 mL, 1 M). The tube was sealed under a positive pressure of nitrogen, stirred and heated to 120°C. The mixture was stirred for 8 hours at 120°C. After allowing the reaction to cool to room temperature, 1,3,5-trimethoxybenzene (56.06 mg, 0.33 mmol, 0.33 equiv) was added as internal standard for calculating NMR yields of enamines.\* The residue was concentrated under vacuum and then dissolved with CH<sub>2</sub>Cl<sub>2</sub> (6 mL) and was transferred to 25 mL flask containing NaBH<sub>3</sub>CN (2 mmol, 2equiv) then we added ACOH (2 mmol, 2 equiv). The suspension was then stirred at ambient temperature for 24 h. The reaction was quenched by the addition of 1M NaOH (aq) (4 mL). The phases were separated and the aqueous layer extracted with two further portions of CH<sub>2</sub>Cl<sub>2</sub>. The combined organic phases were dried over Na<sub>2</sub>SO<sub>4</sub>.

We release the starting amine (when they have high boiling point) with a treatment of solution of 1M HCl (aq).

\* When NMP is the solvent of this reaction, the resulting mixture was diluted with ethyl acetate, washed 3 times with water and once with brine. The combined organic layers were dried over anhydrous  $\text{MgSO}_4$  and ethyl acetate was evaporated under reduced pressure to remove the NMP. The residue was purified by simple washing with diethyl ether or by silica gel column chromatography.

### III. Characterization of compounds 7a-7w

#### N-phenethyl-N-propylpropan-1-amine 7a

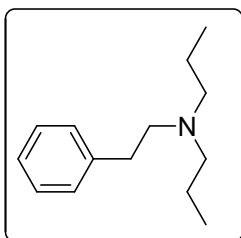

**NMR Yield of corresponding enamine = 90 %**

**Yield (isolated) = 75 %**

**<sup>1</sup>H NMR (400 MHz, CDCl<sub>3</sub>):**  $\delta$  0.88-0.91 (t,  $J$  = 7.3 Hz, 6H), 1.48-1.56 (m, 4H), 2.51-2.54 (t,  $J$  = 8 Hz, 4H), 2.77-2.78 (d, 4H), 7.18-7.20 (d, 3H), 7.25-7.29 (m, 2H).

**<sup>13</sup>C NMR (100 MHz, CDCl<sub>3</sub>):**  $\delta$  11.9, 19.8, 33.0, 51.9, 95.8, 126.0, 128.4, 128.7, 140.3.

**GC/MS:** rt = 08.12 min, M/Z = 205

**HRMS:** 206.1909 (M+H). Theoretical: 206.1909

**Purification:** by silica gel column chromatography, eluent: Pentane/ ethyl acetate 70:30.

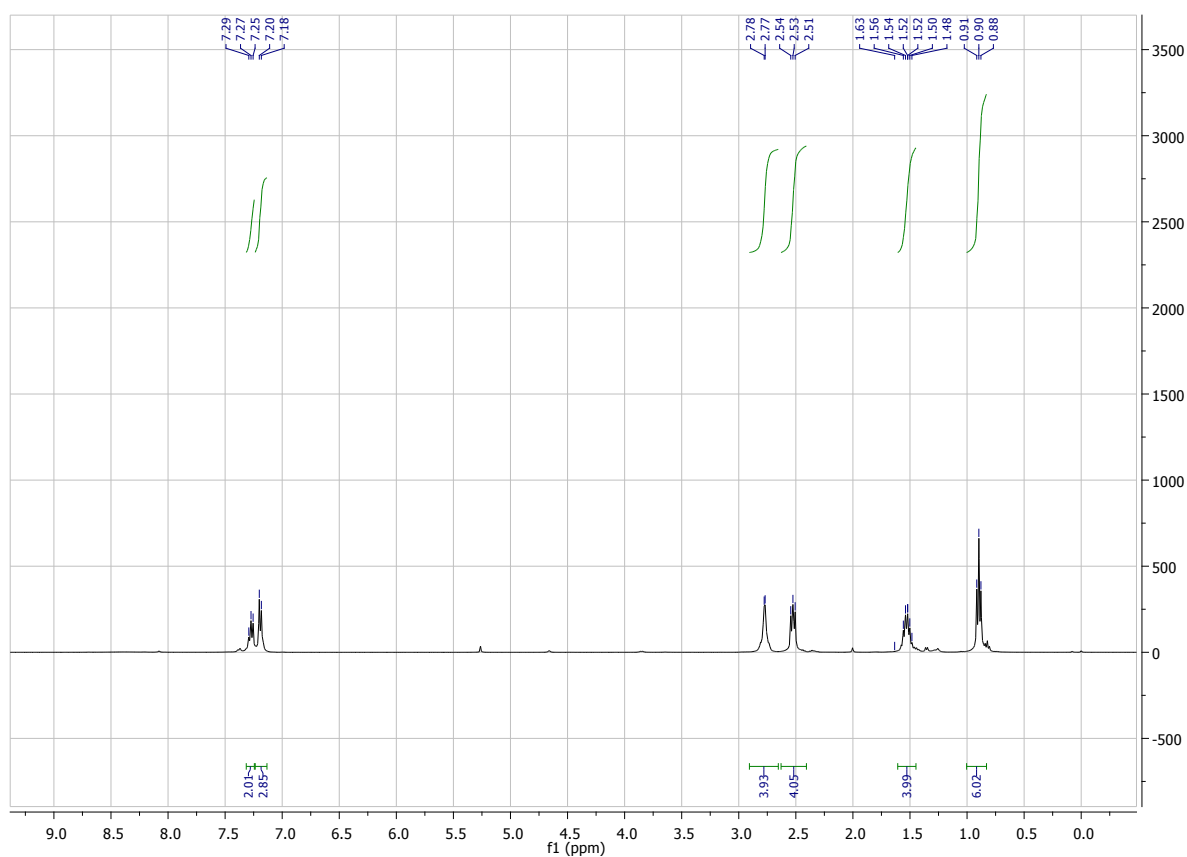

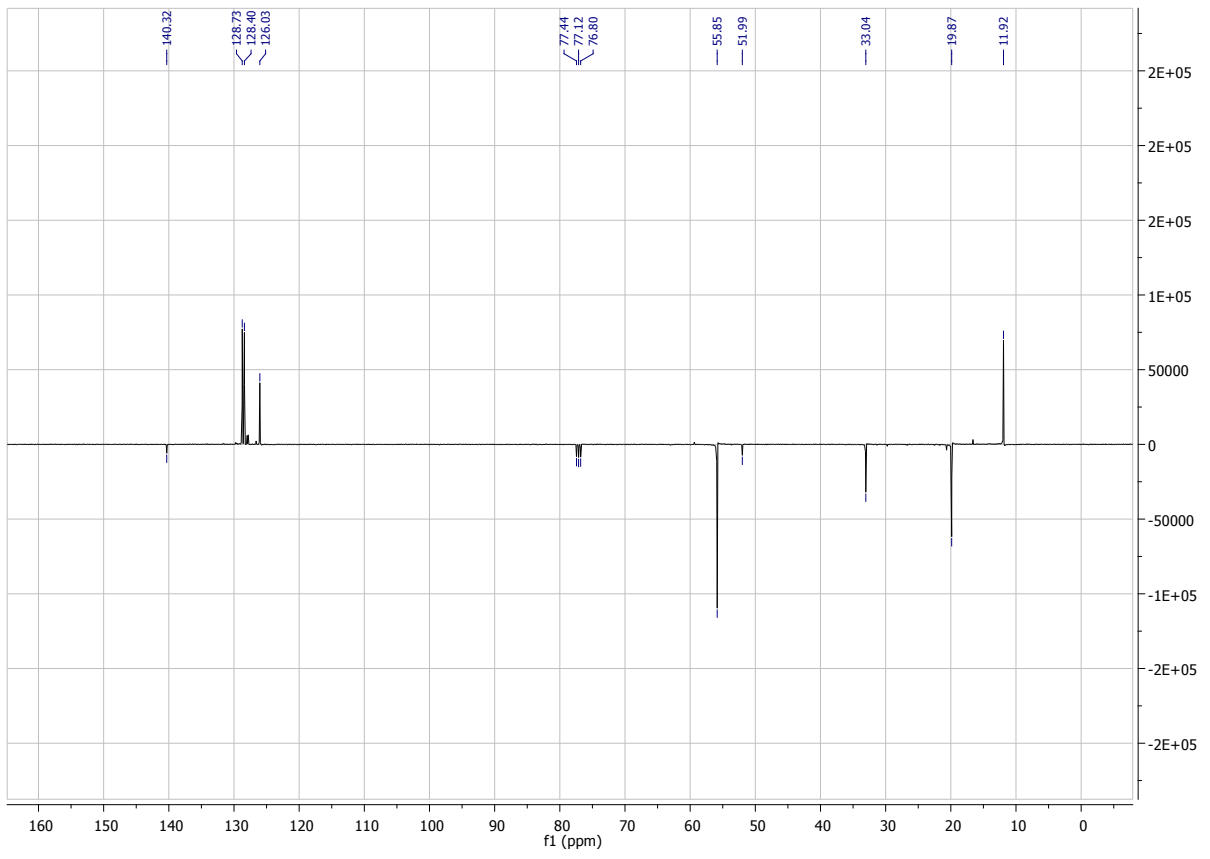

*N*-butyl-*N*-phenethylbutan-1-amine **7b**

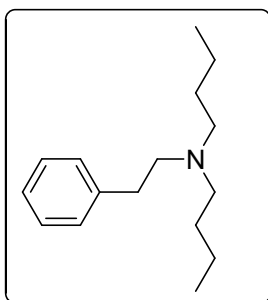

**NMR Yield of corresponding enamine = 86 %**

**Yield (isolated) = 76 %**

**<sup>1</sup>H NMR (400 MHz, CDCl<sub>3</sub>):** δ 0.91-0.95 (t, *J* = 7.3 Hz, 6H), 1.32-1.37 (dd, *J* = 7.3 Hz, 4H), 1.61-1.80 (m, 4H), 2.82-3.00 (t, 4H), 3.08 (s, 4H), 7.20-7.22 (m, 3H), 7.26-7.28 (d, *J* = 6.9 Hz, 2H).

**<sup>13</sup>C NMR (100 MHz, CDCl<sub>3</sub>):** δ 13.6, 20.2, 25.9, 30.7, 52.5, 54.3, 126.8, 128.7, 128.8, 137.1.

**GC/MS:** rt = 09.09 min, M/Z = 233

**HRMS:** 234.2223 (M+H). Theoretical: 234.2222

**Purification:** by silica gel column chromatography, eluent: Pentane/ ethyl acetate 60:40.

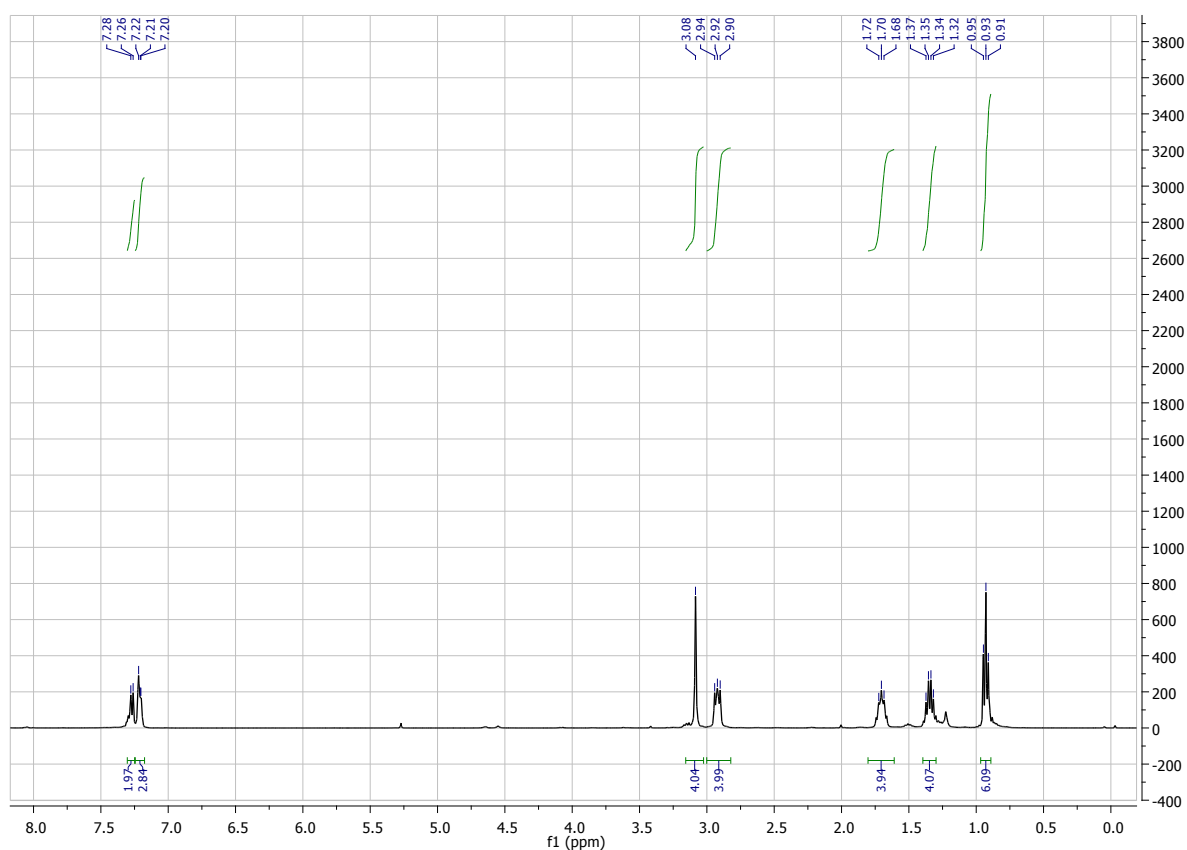

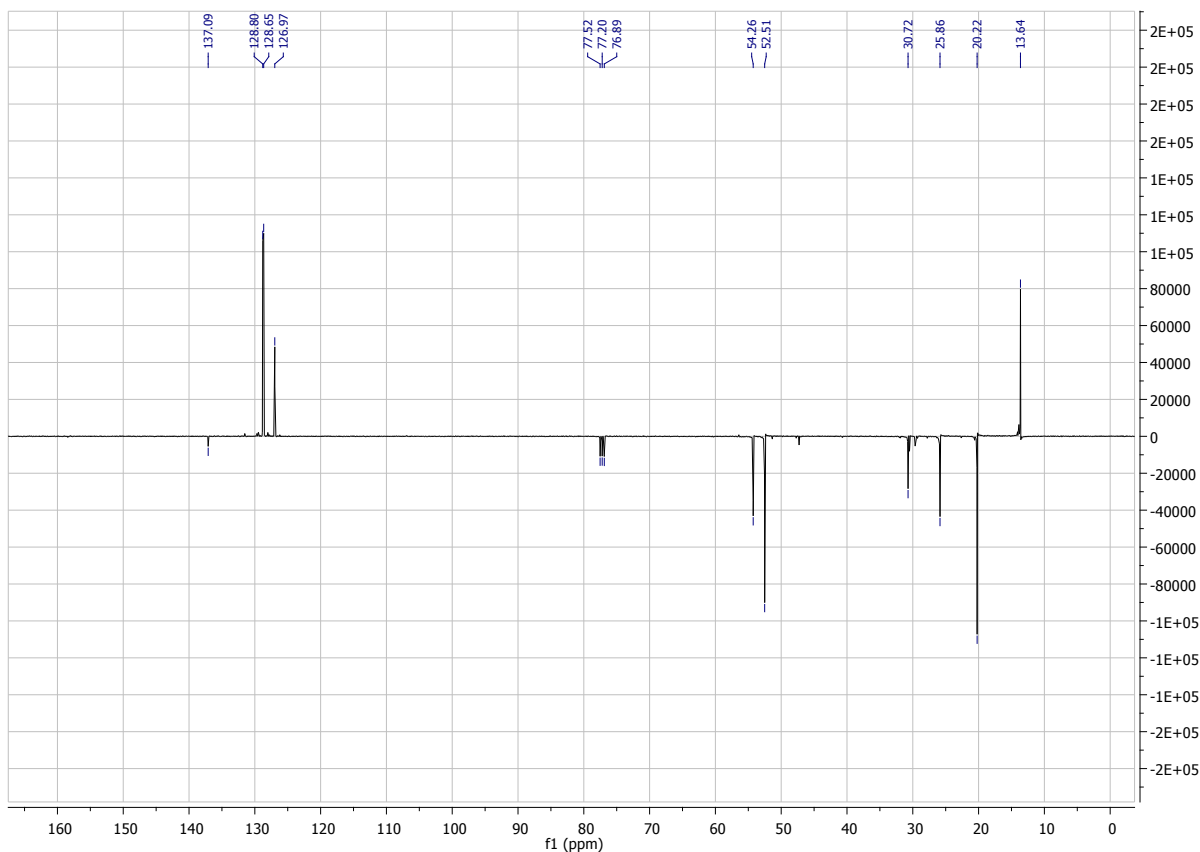

*N*-phenethyl-*N*-propylbutan-1-amine 7c

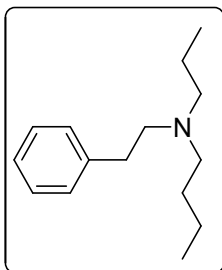

**NMR Yield of corresponding enamine = 75 %**

**Yield (isolated) = 80 %**

**<sup>1</sup>H NMR (400 MHz, CDCl<sub>3</sub>):** δ 0.94-1.05 (m, 6H), 1.35-1.45 (m, 2H), 1.75-1.95 (m, 4H), 3.05-3.12 (t, *J* = 15.5 Hz, 4H), 3.23-3.25 (d, *J* = 6.7 Hz, 4H), 7.27-7.33 (dd, *J*<sup>1</sup> = 7.02 Hz, *J*<sup>2</sup> = 17.1 Hz, 5H).

**<sup>13</sup>C NMR (100 MHz, CDCl<sub>3</sub>):** δ 11.2, 13.5, 16.86, 20.1, 25.0, 30.0, 52.3, 53.9, 54.0, 127.2, 128.7, 128.9, 136.2.

**GC/MS:** rt = 08.61 min, M/Z = 219

**HRMS:** 220.2067 (M+H). Theoretical: 220.2065

**Purification:** Washing with diethyl ether.

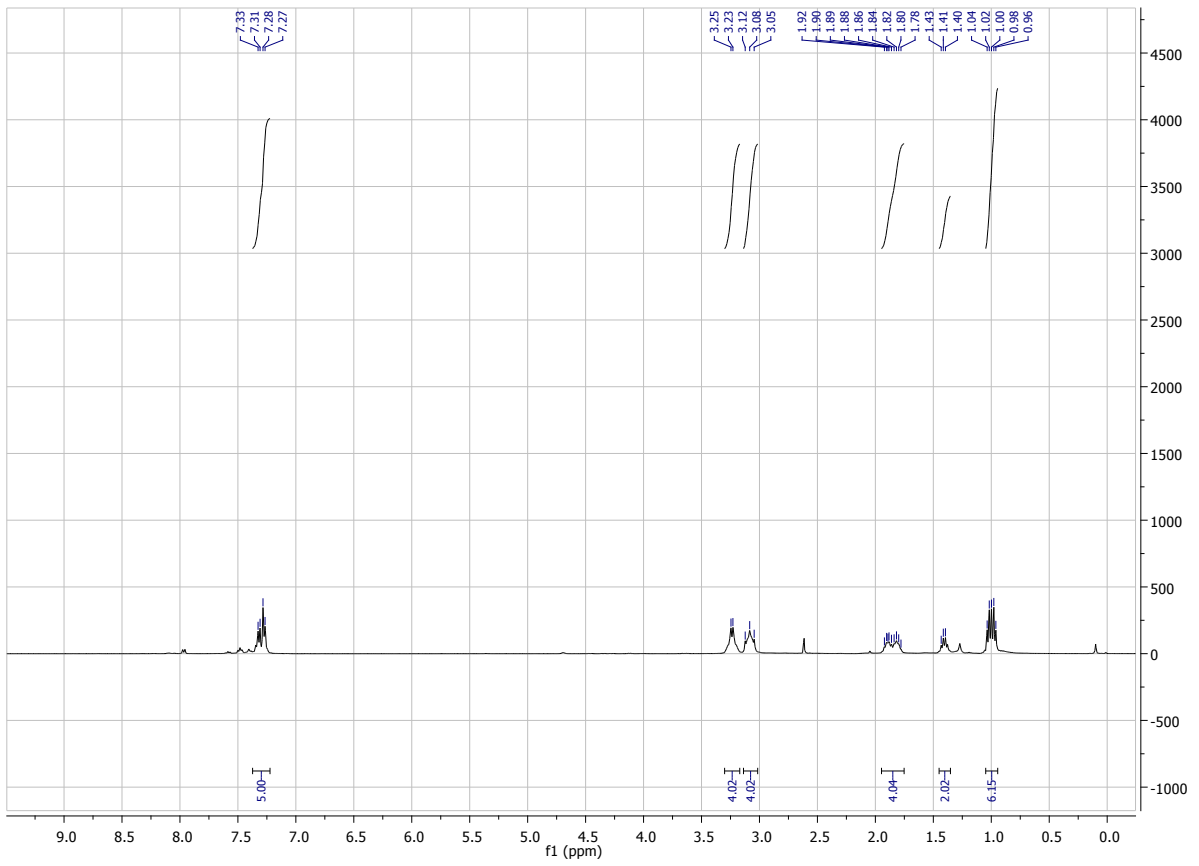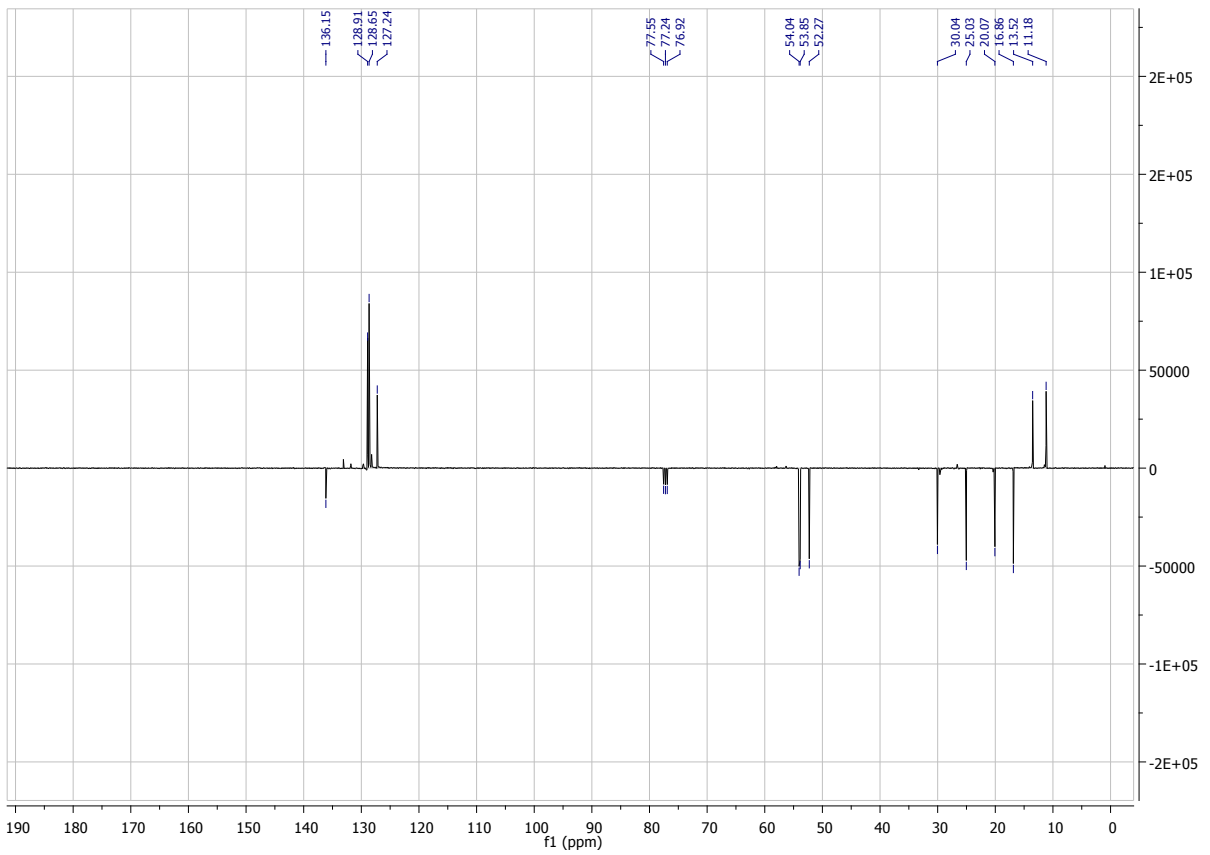



*N*-ethyl-*N*-phenethylbutan-1-amine 7d

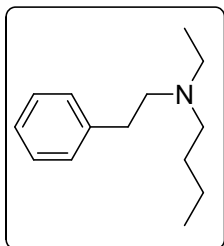

**NMR Yield of corresponding enamine = 84 %**

**Yield (isolated) = 68 %**

**<sup>1</sup>H NMR (400 MHz, CDCl<sub>3</sub>):** δ 0.91-0.95 (t, *J* = 7.1 Hz, 3H), 1.06-1.10 (t, *J* = 7.1 Hz, 3H), 1.30-1.35 (m, 2H), 2.52-2.56 (m, 2H), 2.62-2.67 (dd, *J'* = 6.9 Hz, *J* = 13.9 Hz, 2H), 2.75-2.79 (t, *J* = 9.4 Hz, 4H), 7.20-7.21 (d, *J* = 7.1 Hz, 3H), 7.27-2.31 (d, *J* = 7.8 Hz, 2H).

**<sup>13</sup>C NMR (100 MHz, CDCl<sub>3</sub>):** δ 11.6, 14.0, 20.8, 29.0, 33.3, 47.5, 53.1, 55.4, 125.8, 128.7, 140.6.

**GC/MS:** rt = 08.16 min, M/Z = 205

**HRMS:** 206.1836 (M+H). Theoretical: 206.1834

**Purification:** Washing with diethyl ether.

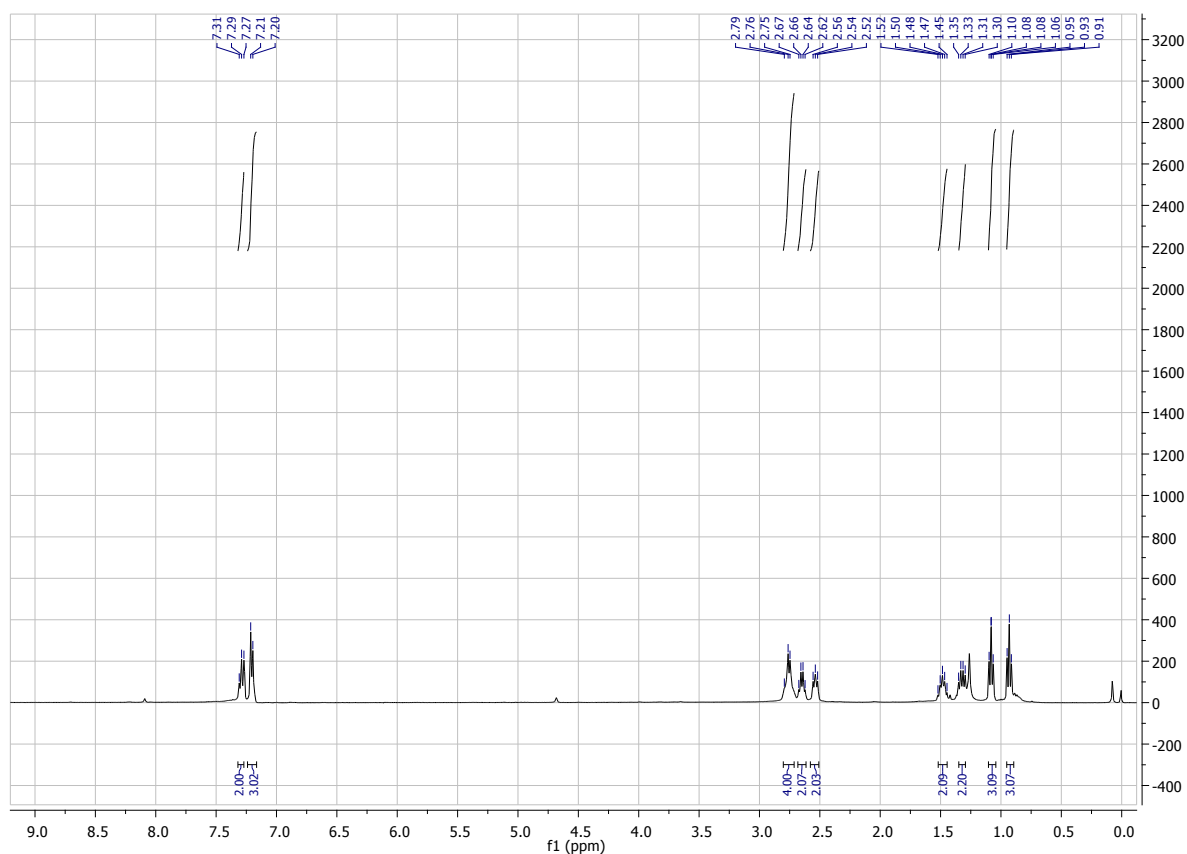

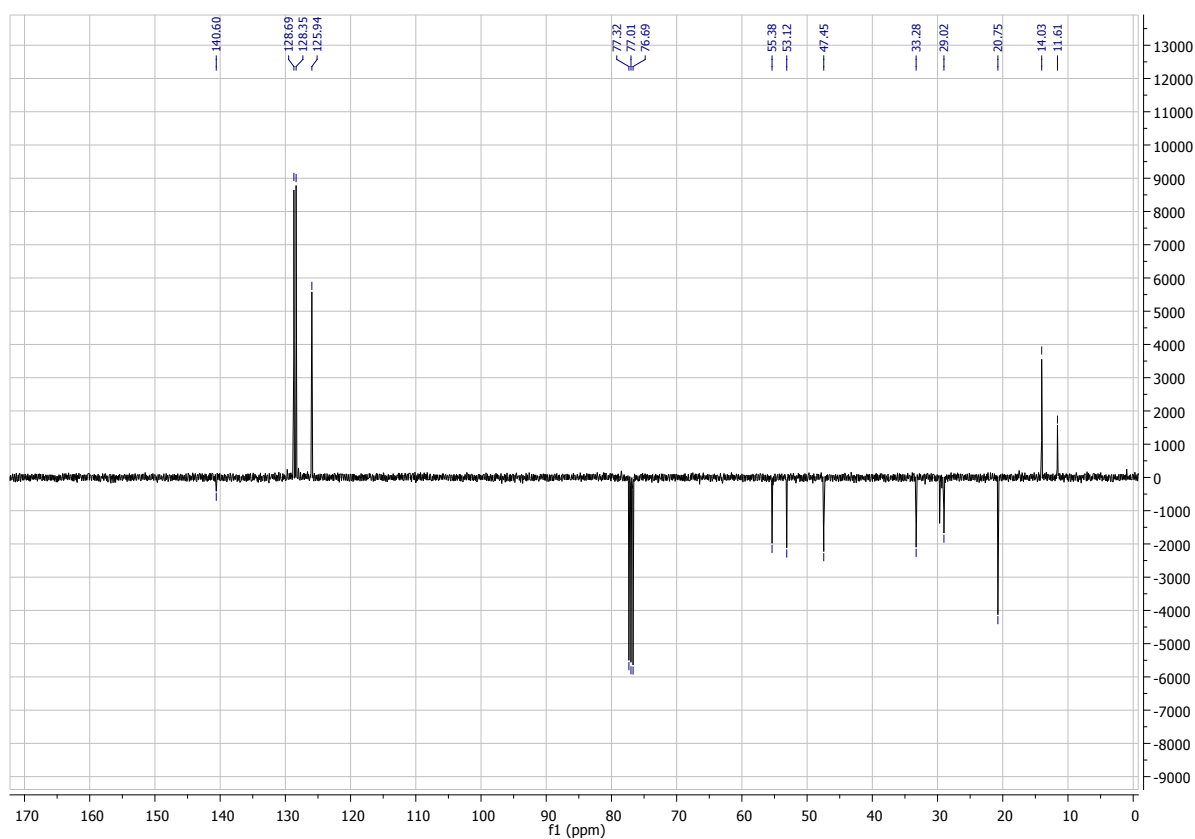

*N*-methyl-*N*-phenethylbutan-1-amine 7e

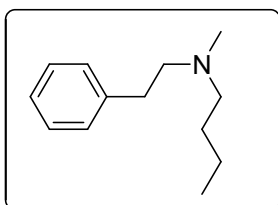

**NMR Yield of corresponding enamine = 70 %**

**Yield (isolated) = 64 %**

**<sup>1</sup>H NMR (400 MHz, CDCl<sub>3</sub>):** δ 0.88-0.94 (t, *J* = 7.3 Hz, 3H), 1.29-1.36 (m, 2H), 1.43-1.51 (m, 2H), 2.30 (s, 3H), 2.36-2.42 (dd, *J*<sup>1</sup> = 6.6 Hz, *J*<sup>2</sup> = 8.7 Hz, 2H), 2.58-2.62 (dd, *J*<sup>1</sup> = 5.3 Hz, *J*<sup>2</sup> = 10.7 Hz, 2H), 2.75-2.80 (dd, *J*<sup>1</sup> = 6.2 Hz, *J*<sup>2</sup> = 10 Hz, 2H), 7.19-7.22 (d, *J* = 7.1 Hz, 3H), 7.26-7.30 (m, 2H).

**<sup>13</sup>C NMR (100 MHz, CDCl<sub>3</sub>):** δ 14.1, 20.7, 29.5, 33.8, 42.3, 57.4, 59.7, 125.9, 128.3, 128.7, 140.7.

**GC/MS:** rt = 07.79 min, *M/Z* = 191

**HRMS:** 192.1756 (*M*+*H*). Theoretical: 192.1752

**Purification:** by silica gel column chromatography, eluent: Pentane/ ethyl acetate 70:30.

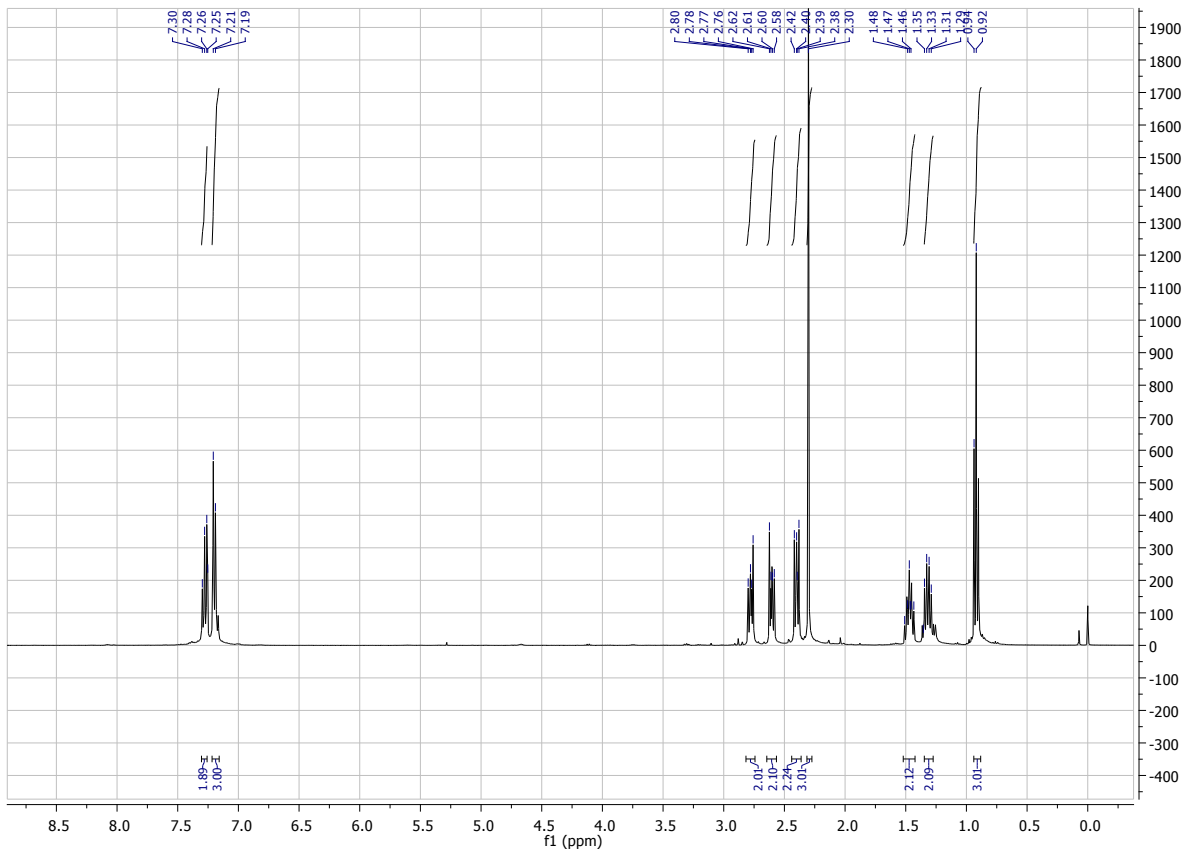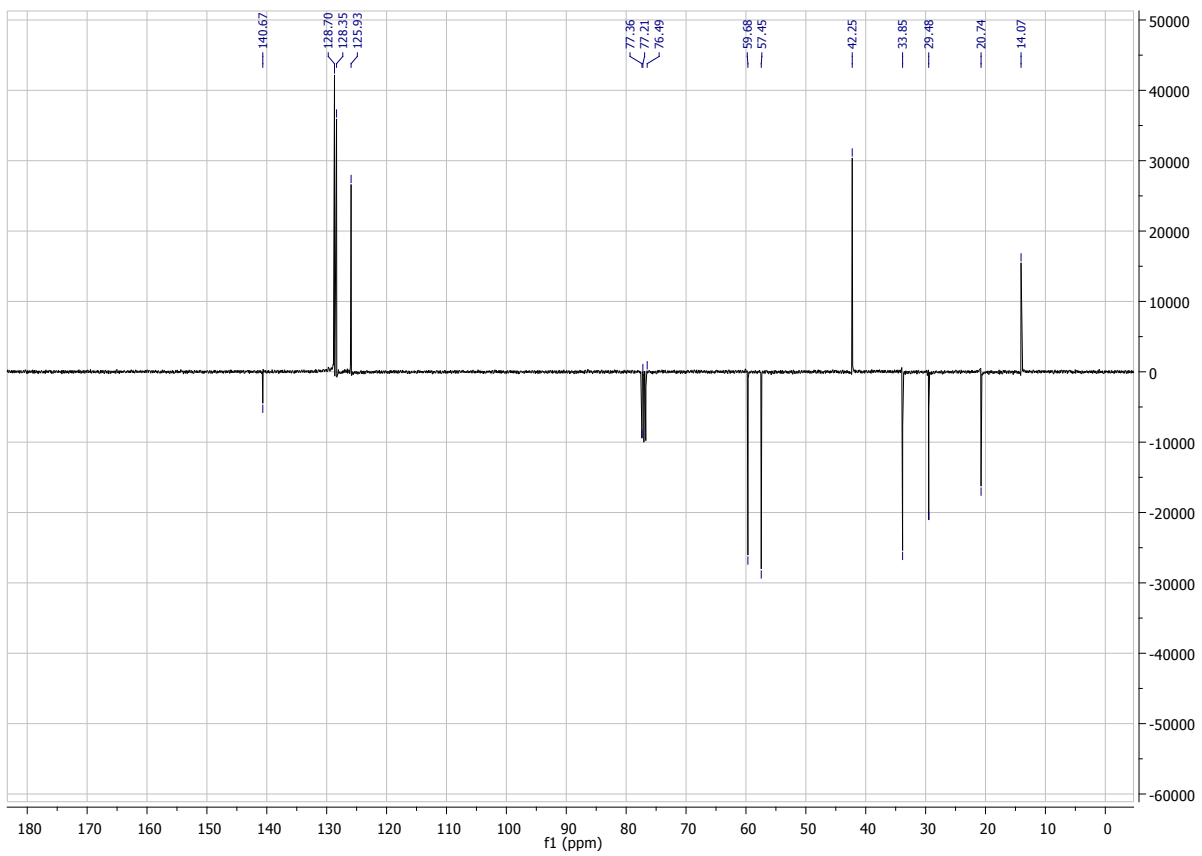

*N*-allyl-*N*-phenethylprop-2-en-1-amine 7f

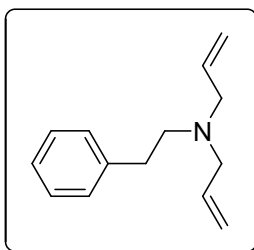

**mp:** 129°C-130°C

**NMR Yield of corresponding enamine = 70 %**

**Yield (isolated) = 70 %**

**<sup>1</sup>H NMR (400 MHz, CDCl<sub>3</sub>):** δ 2.73-2.77 (m, 4H), 3.18-3.2 (d, *J* = 6.5 Hz, 4H), 5.15-5.23 (ddd, *J* = 13.7 Hz, *J* = 11.1 Hz, *J* = 1.2 Hz, 4H), 5.84-5.94 (ddt, *J* = 16.7 Hz, *J* = 10.1 Hz, *J* = 6.5 Hz, 2H), 7.17-7.21 (t, *J* = 7.2 Hz, 3H), 7.27-7.30 (m, 2H).

**<sup>13</sup>C NMR (100 MHz, CDCl<sub>3</sub>):** δ 30.2, 53.1, 54.9, 125.8, 126.3, 127.4, 128.7, 129.0, 136.1.

**GC/MS:** rt = 08.04 min, M/Z = 201

**HRMS:** 202.1597 (M+H). Theoretical: 202.1596

**Purification:** by silica gel column chromatography, eluent: Pentane/ ethyl acetate 65:35.

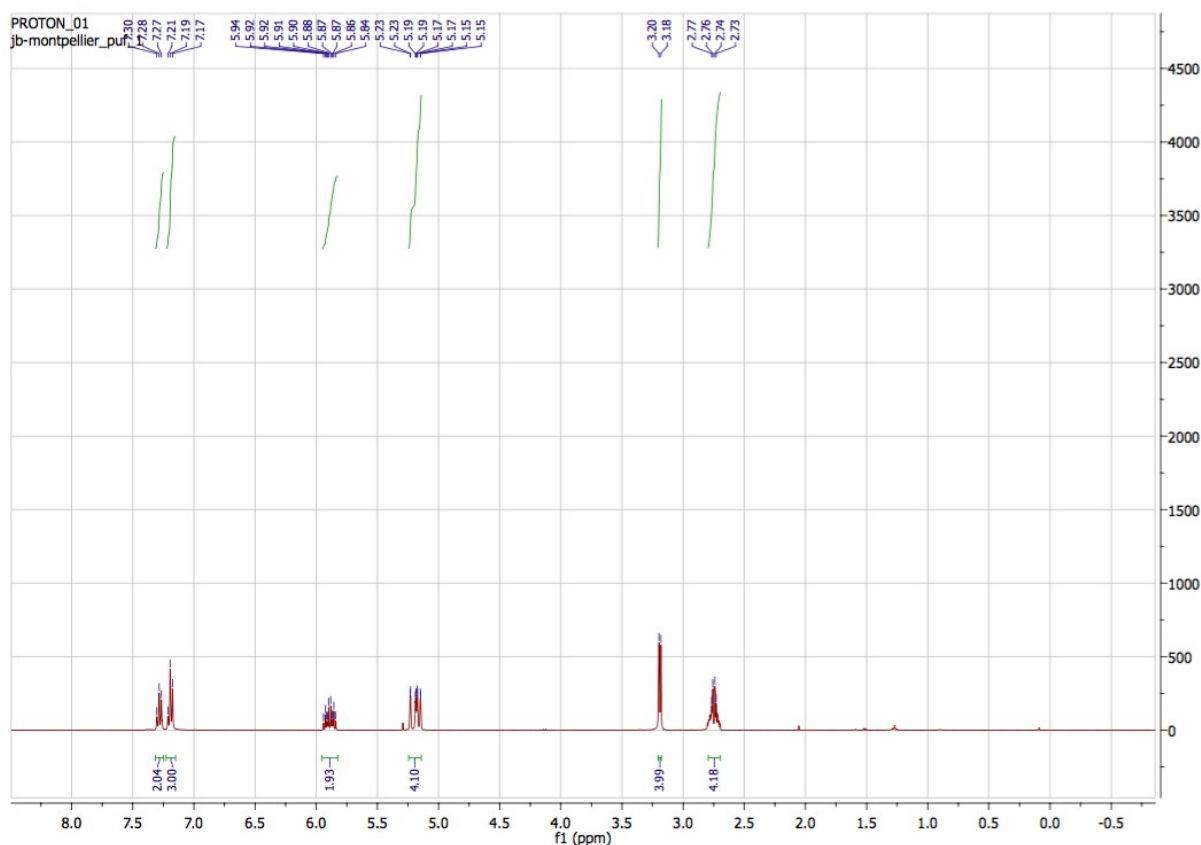

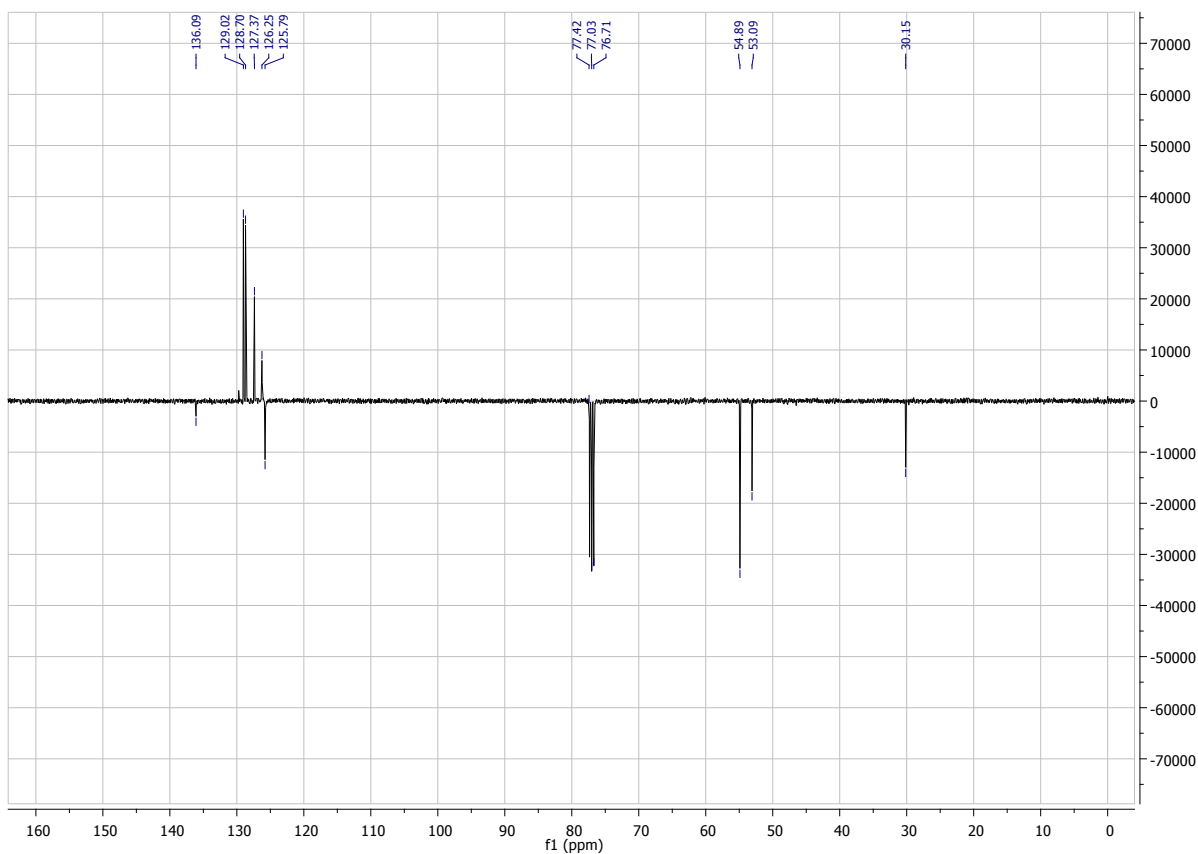

***N*-hexyl-*N*-phenethylhexan-1-amine 7g**

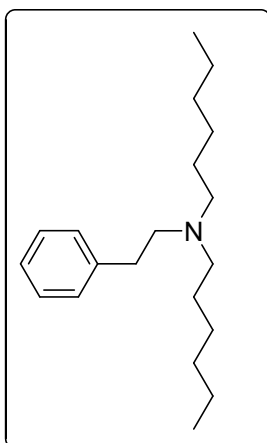

**NMR Yield of corresponding enamine = 83 %**

**Yield (isolated) = 70 %**

**<sup>1</sup>H NMR (400 MHz, CDCl<sub>3</sub>):** δ 0.87-0.91 (t, *J* = 6.6 Hz, 6H), 1.30-1.32 (m, 16H), 2.97-3.11 (m, 4H), 3.19 (s, 4H), 7.23-7.28 (dd, *J* = 7.9, 6.4 Hz, 3H), 7.31-7.35 (dd, *J* = 6.4, 7.8 Hz, 2H).

**<sup>13</sup>C NMR (100 MHz, CDCl<sub>3</sub>):** δ 15.0, 22.7, 27, 27.3, 33.4, 54.1, 56, 125.9, 128.3, 128.7, 140.8.

**GC/MS:** rt = 10.87 min, M/Z = 289

**HRMS:** 290.2849 (M+H). Theoretical: 290.2848

**Purification:** by silica gel column chromatography, eluent: Pentane/ ethyl acetate 50:50.

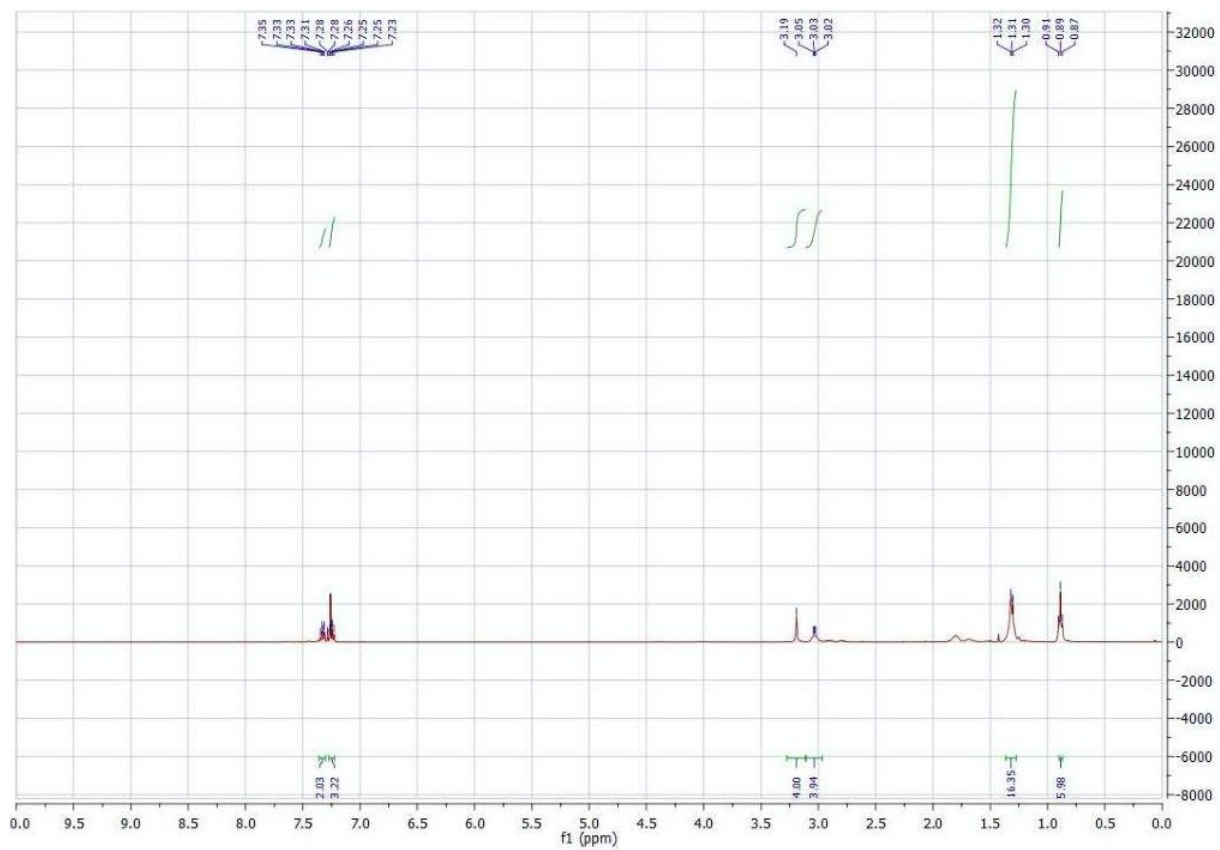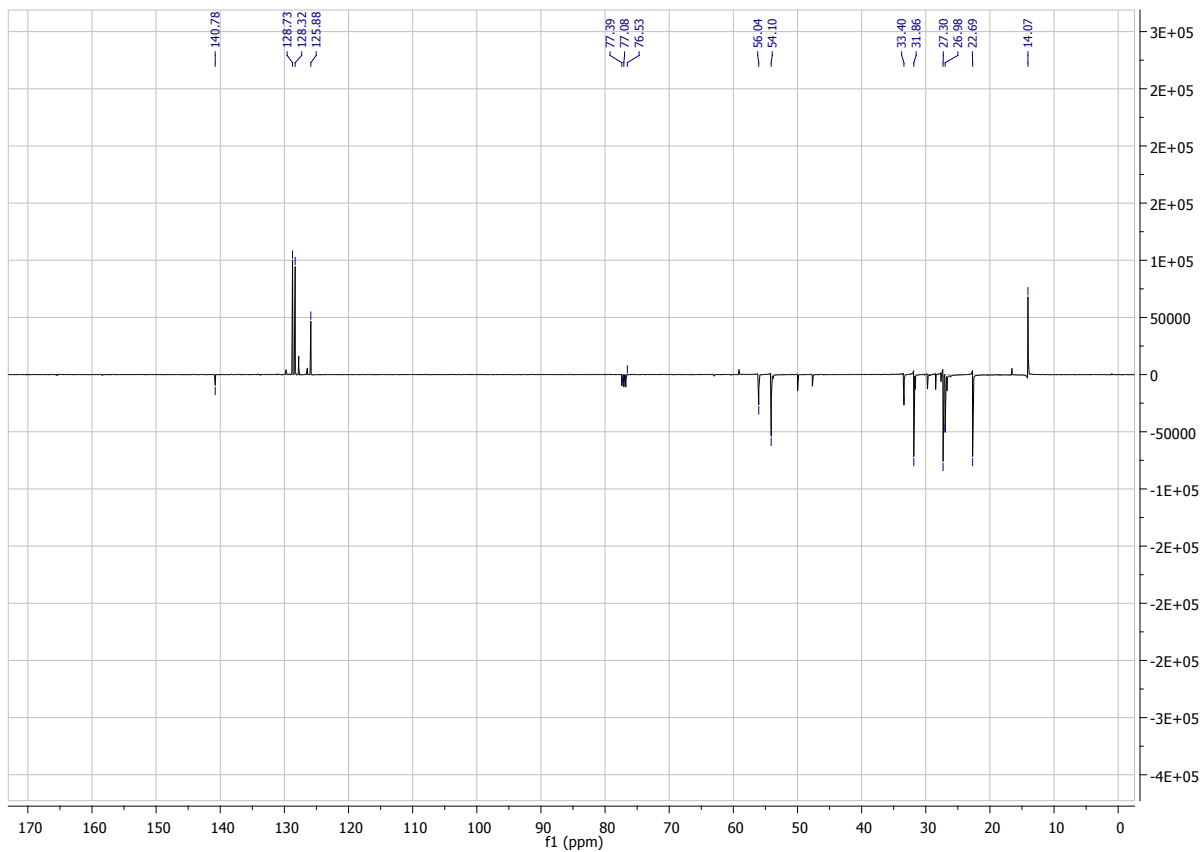

*N*-octyl-*N*-phenethyloctan-1-amine 7h

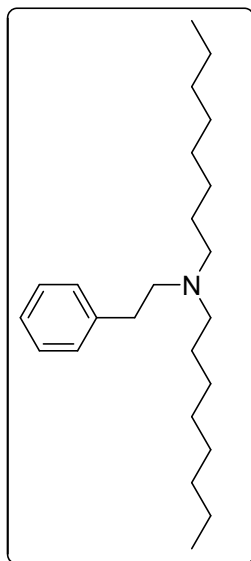

**mp:** 133°C-135°C

**NMR Yield of corresponding enamine = 81 %**

**Yield (isolated) = 76 %**

**<sup>1</sup>H NMR (400 MHz, CDCl<sub>3</sub>):** δ 0.87-0.90 (t, *J* = 6.8 Hz, 6H), 1.28 (m, 24H), 2.46-2.49 (m, 4H), 2.66-2.72 (d, *J* = 7.3 Hz, 4H), 7.18-7.20 (d, *J* = 7.2 Hz, 3H), 7.26-7.28 (d, *J* = 8.2 Hz, 2H).

**<sup>13</sup>C NMR (100 MHz, CDCl<sub>3</sub>):** δ 13.9, 22.5, 23.1, 26.8, 28.9, 29.0, 31.6, 47.7, 52.5, 53.8, 127.2, 128.6, 128.4, 128.8, 136.2.

**GC/MS:** rt = 12.48 min, M/Z = 345

**HRMS:** 346.3474 (M+H). Theoretical: 346.3474

**Purification:** Washing with diethyl ether.

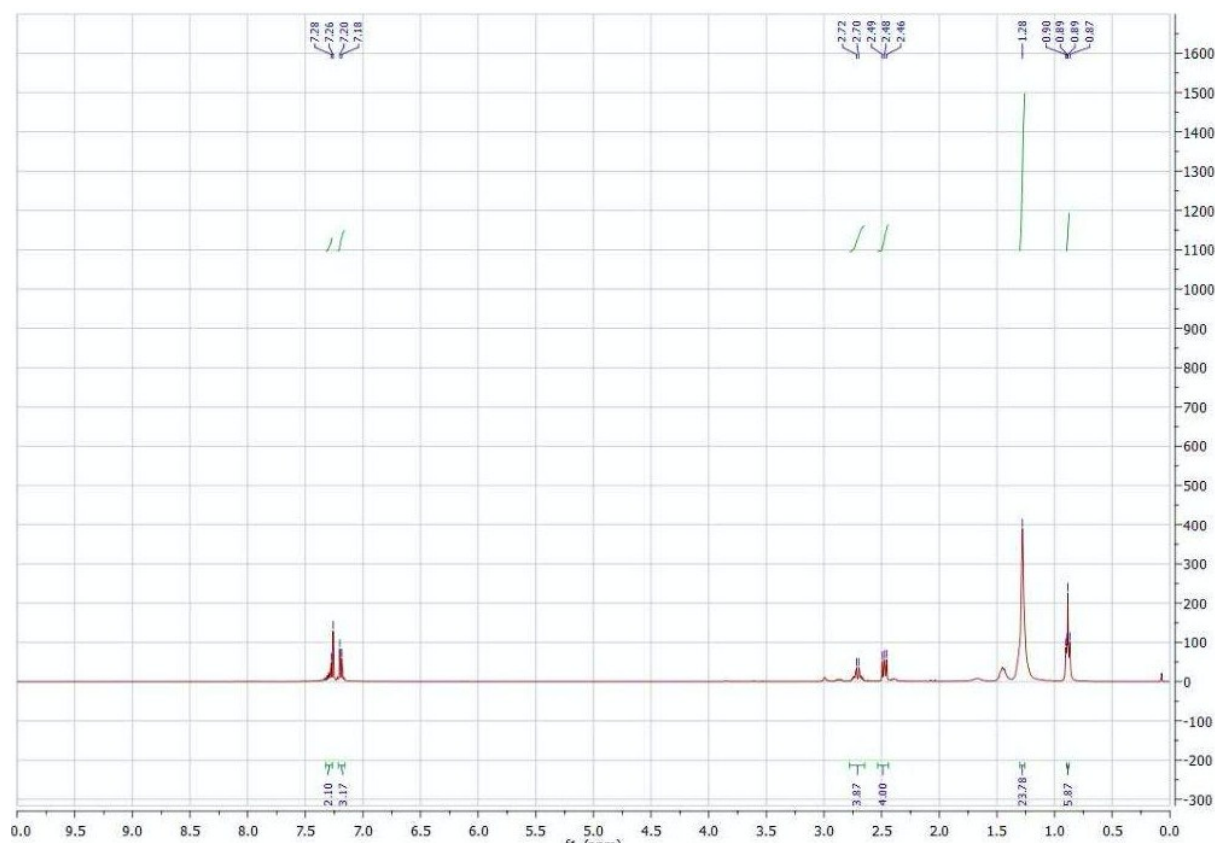

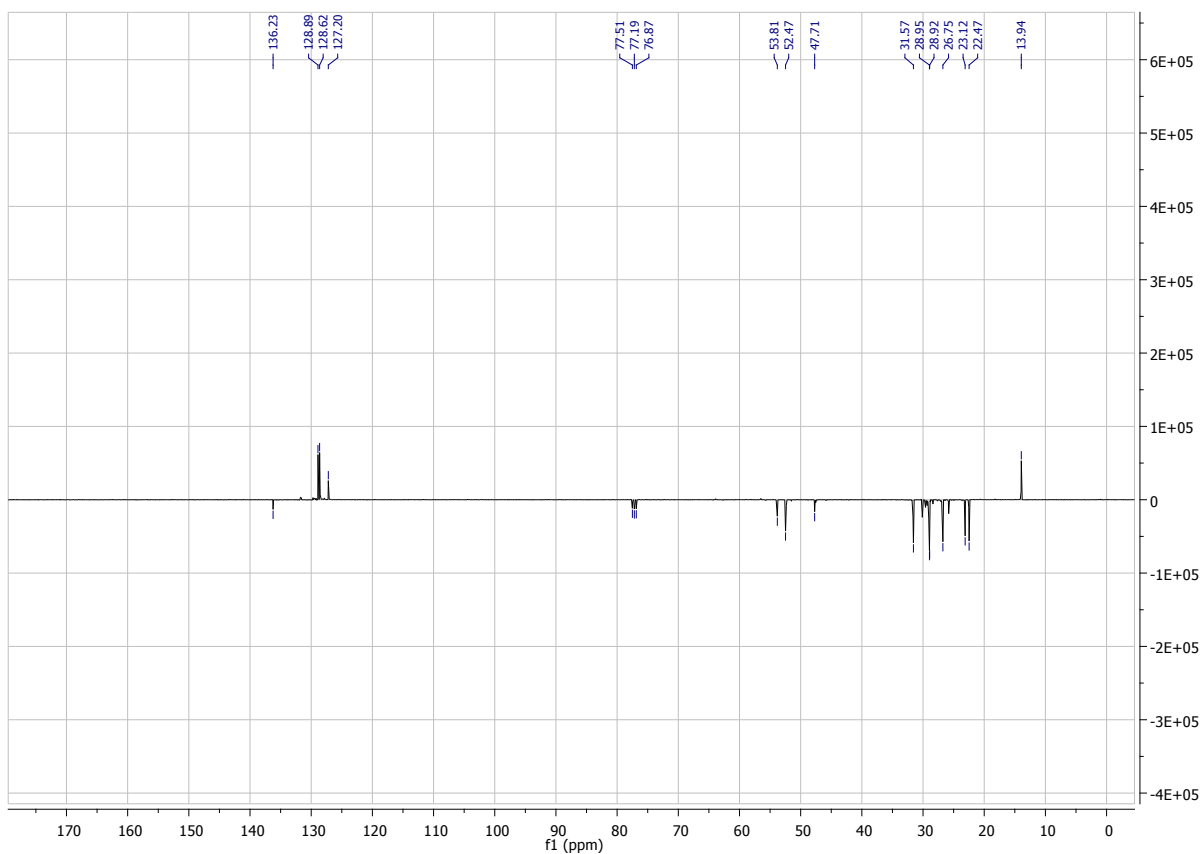

*N*-methyl-*N*-phenethylcyclohexanamine **7i**

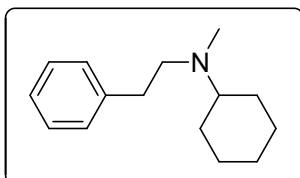

**mp:** 164°C-165°C

**NMR Yield of corresponding enamine = 84 %**

**Yield (isolated) = 77 %**

**<sup>1</sup>H NMR (400 MHz, CDCl<sub>3</sub>):** δ 1.23-1.46 (m, 6H), 1.69-1.72 (d, *J* = 13 Hz, 1H), 1.89-1.92 (d, *J* = 13.1 Hz, 2H), 2.19-2.22 (d, *J* = 11.2 Hz, 2H), 3.09-3.13 (m, 2H), 3.17-3.22 (m, 2H), 7.24-7.26 (d, *J* = 7.2 Hz, 3H), 7.29-7.31 (d, *J* = 7 Hz, 2H).

**<sup>13</sup>C NMR (100 MHz, CDCl<sub>3</sub>):** δ 25.1, 25.2, 26.9, 31.3, 36.3, 54.7, 64.1, 127.0, 128.7, 128.9, 137.0.

**GC/MS:** rt = 09.5 min, *M/Z* = 217

**HRMS:** 218.1909 (M+H). Theoretical: 218.1909

**Purification:** Washing with diethyl ether.



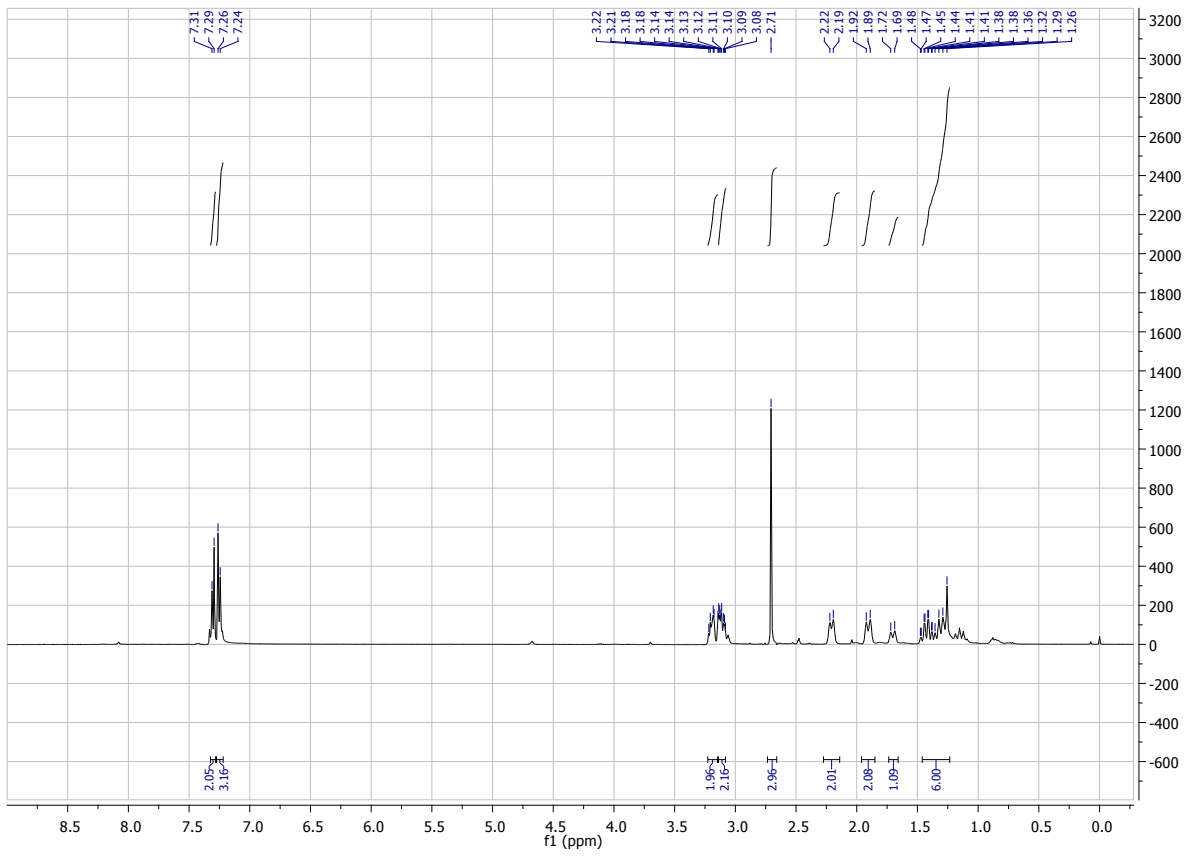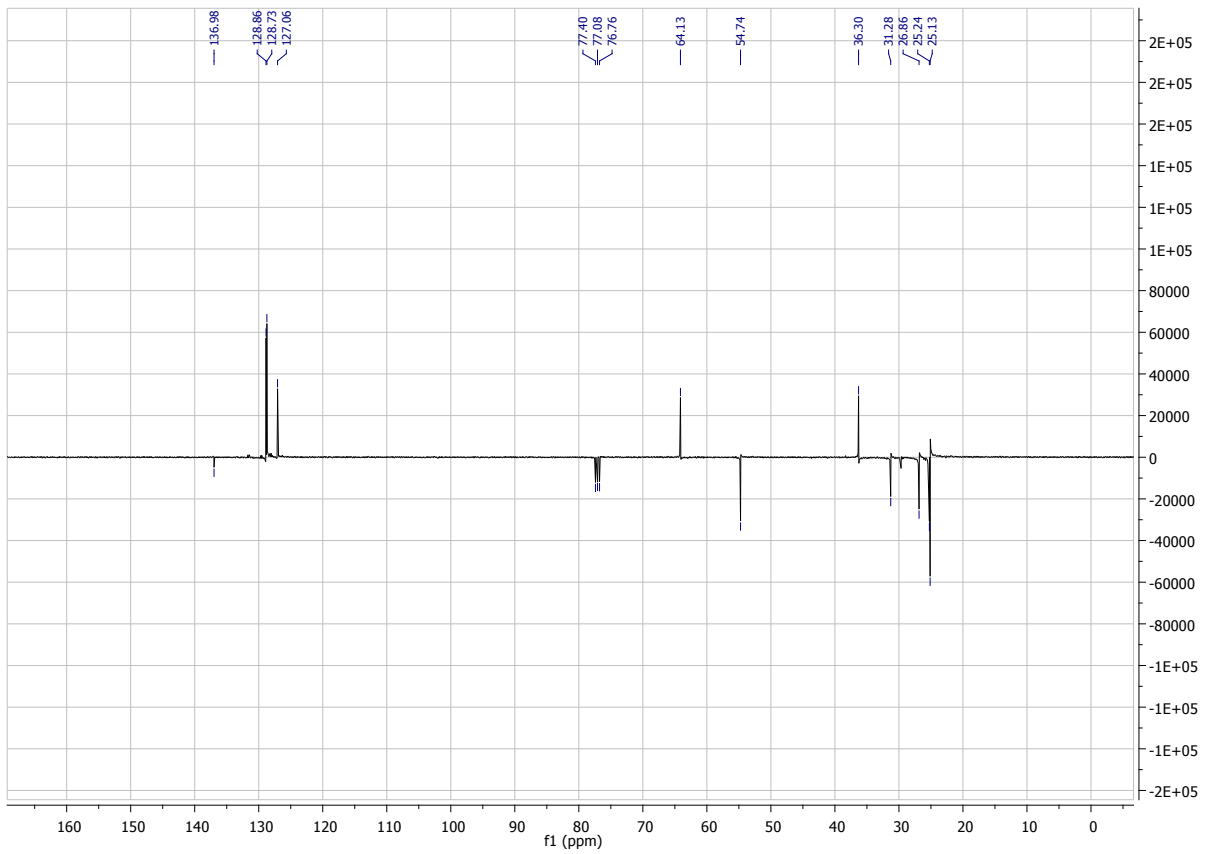

*N,N*-diethyl-2-phenylethanamine 7j

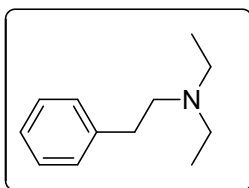

**NMR Yield of corresponding enamine = 80 %**

**Yield (isolated) = 74 %**

**<sup>1</sup>H NMR (400 MHz, CDCl<sub>3</sub>):** δ 1.06-1.09 (t, *J* = 7.2 Hz, 6H), 2.60-2.70 (q, *J* = 7.2 Hz, 4H), 2.72-2.87 (m, 4H), 7.19-7.21 (d, *J* = 7.2 Hz, 3H), 7.29-7.31 (m, 2H).

**<sup>13</sup>C NMR (100 MHz, CDCl<sub>3</sub>):** δ 11.8, 33.5, 47.0, 55.0, 125.9, 128.7, 140.8.

**GC/MS:** rt = 08.47 min, *M/Z* = 177

**HRMS:** 178.1598 (*M*+*H*). Theoretical: 178.1596

**Purification:** by silica gel column chromatography, eluent: Pentane/ ethyl acetate 60:40.

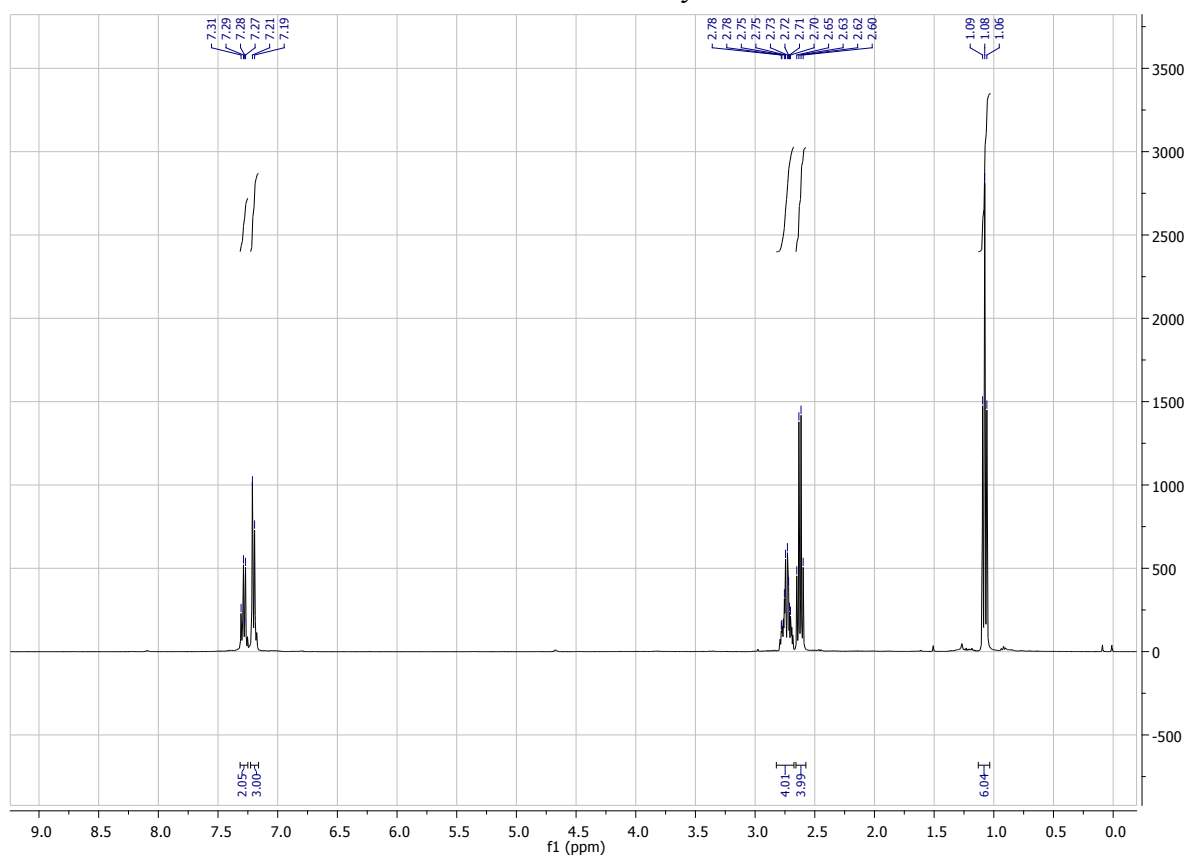

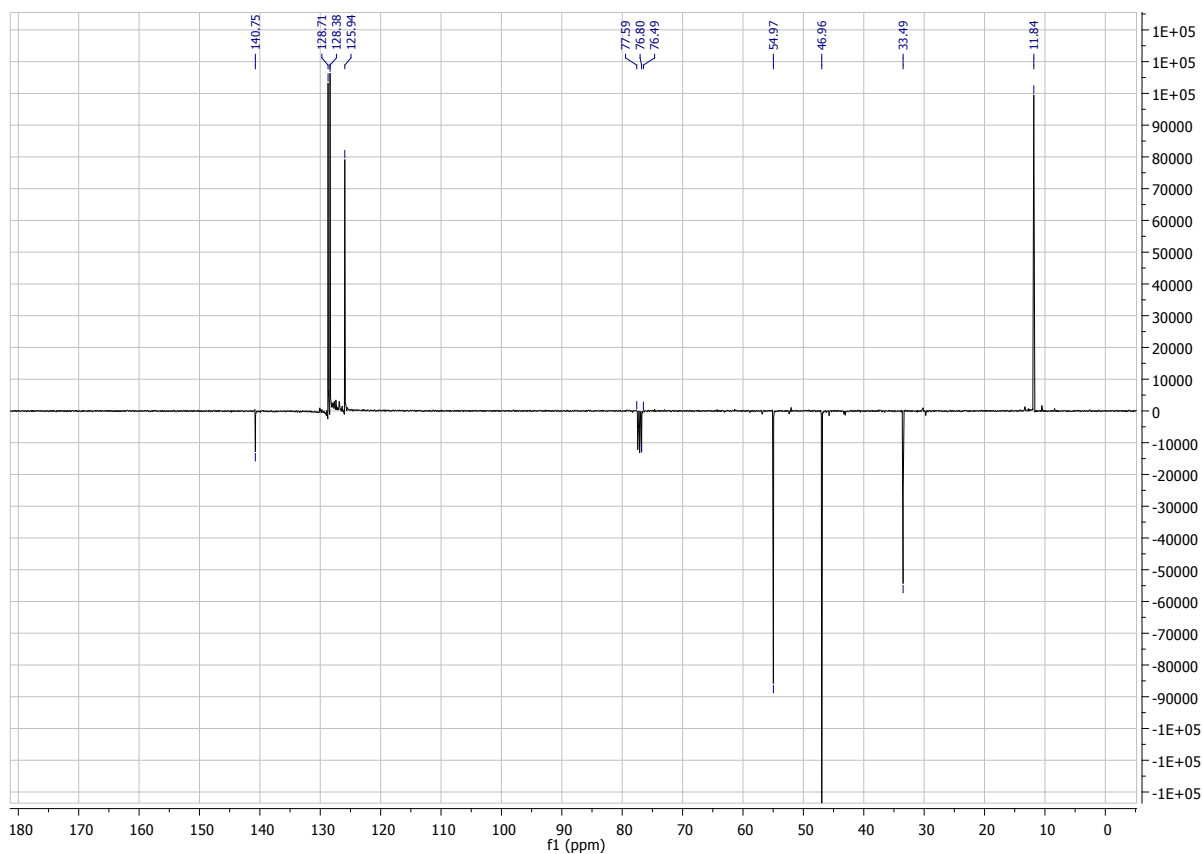

### 1-phenethylpiperidine **7k**

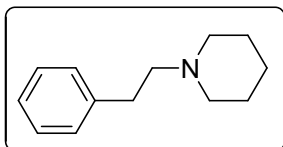

**NMR Yield of corresponding enamine = 90 %**

**Yield (isolated) = 86 %**

**<sup>1</sup>H NMR (400 MHz, CDCl<sub>3</sub>):** δ 1.26 (s, 1H), 1.44-1.49 (t, *J* = 8.6 Hz, 2H), 1.62-1.67 (dt, *J*<sup>1</sup> = 5.6 Hz, *J*<sup>2</sup> = 11.1 Hz, 4H), 2.51 (s, 3H), 2.56-2.63 (m, 2H), 2.78-2.88 (m, 2H), 7.2-7.22 (d, *J* = 7.7 Hz, 3H), 7.29-7.33 (d, *J* = 7 Hz, 2H).

**<sup>13</sup>C NMR (100 MHz, CDCl<sub>3</sub>):** δ 24.4, 26.9, 33.5, 54.5, 61.3, 126.0, 128.4, 128.7, 140.5.

**GC/MS:** rt = 08.35 min, M/Z = 189

**HRMS:** 190.1598 (M+H). Theoretical: 190.1596

**Purification:** by silica gel column chromatography, eluent: Pentane/ ethyl acetate 80:20.

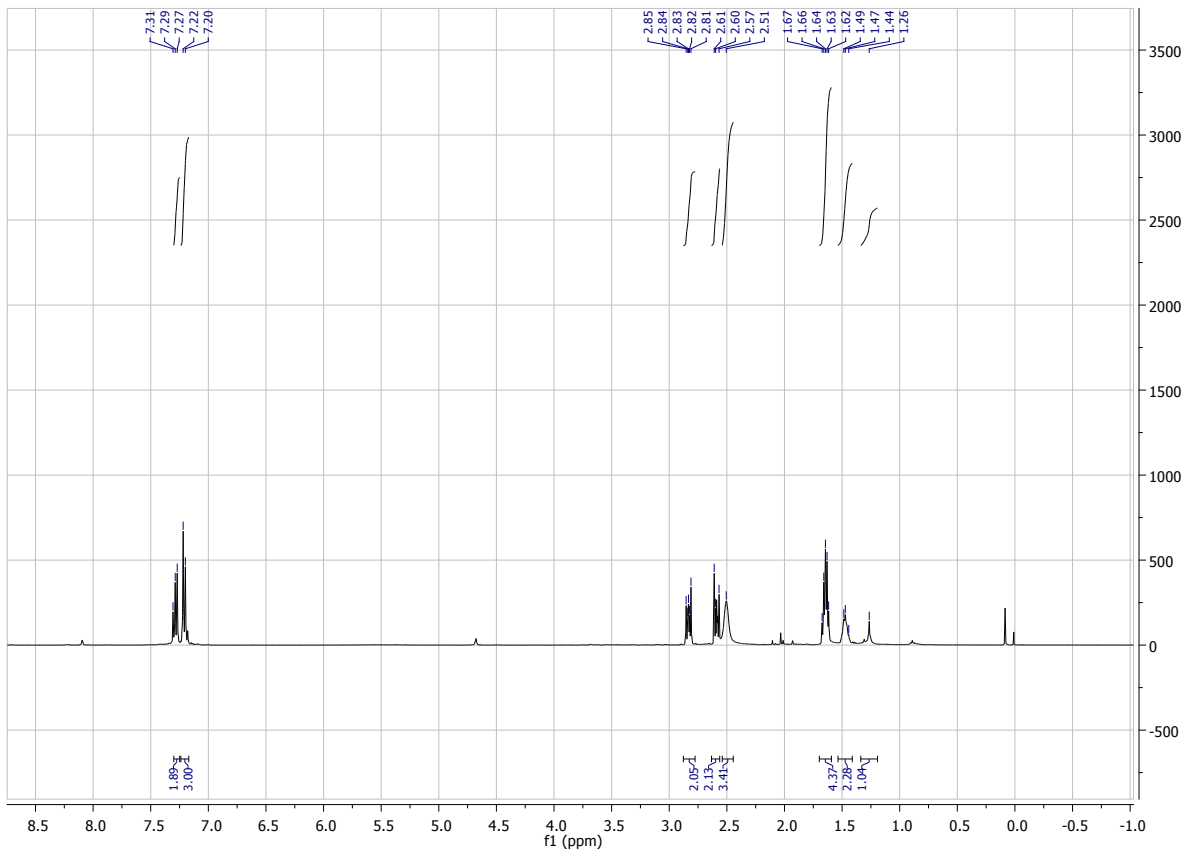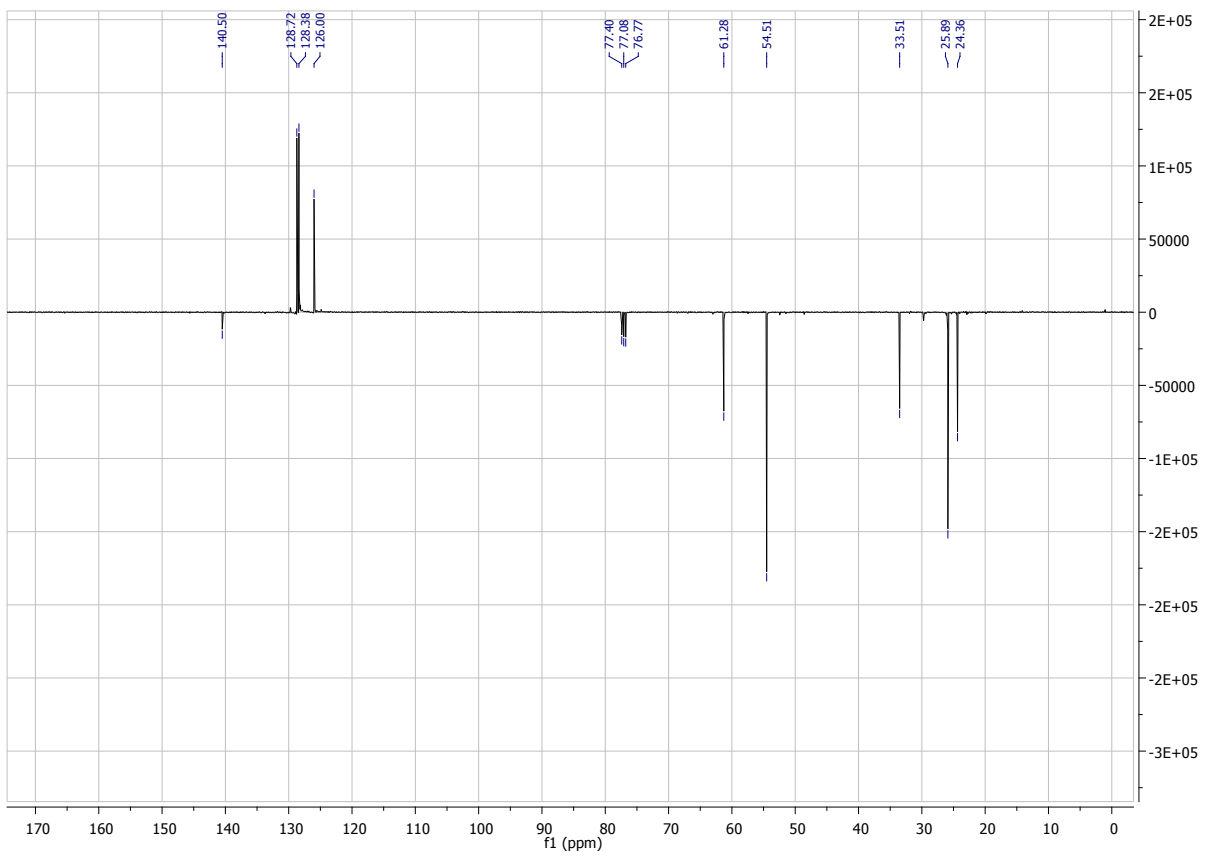

4-methyl-1-phenethylpiperidine 71

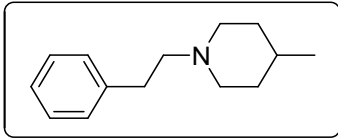

**NMR Yield of corresponding enamine = 82 %**

**Yield (isolated) = 80 %**

**$^1\text{H}$  NMR (400 MHz,  $\text{CDCl}_3$ ):**  $\delta$  0.95-0.97 (d,  $J = 5.4$  Hz, 3H), 1.26 (s, 1H), 1.45 (s, 2H), 1.69-1.71 (d,  $J = 9.5$  Hz, 2H), 2.15-2.2 (t,  $J = 10.2$ Hz, 2H), 2.89-2.74 (dd,  $J^1 = 6.3$ Hz,  $J^2 = 10.4$ Hz, 2H), 2.90-7.94 (dd,  $J^1 = 6.3$ Hz,  $J^2 = 10.4$ Hz, 2H), 3.11-3.14 (d,  $J = 10.9$ Hz, 2H), 7.20-7.22 (d,  $J = 7.2$ Hz, 3H), 7.28-7.3 (t,  $J = 7.2$ Hz, 2H).

**$^{13}\text{C}$  NMR (100 MHz,  $\text{CDCl}_3$ ):**  $\delta$  22.0, 29.7, 30.4, 32.9, 33.4, 53.6, 60.3, 126.3, 128.5, 128.7, 139.6.

**GC/MS:** rt = 08.32 min, M/Z = 203

**HRMS:** 204.1753 (M+H). Theoretical: 204.1752

**Purification:** by silica gel column chromatography, eluent: Pentane/ ethyl acetate 75:25.

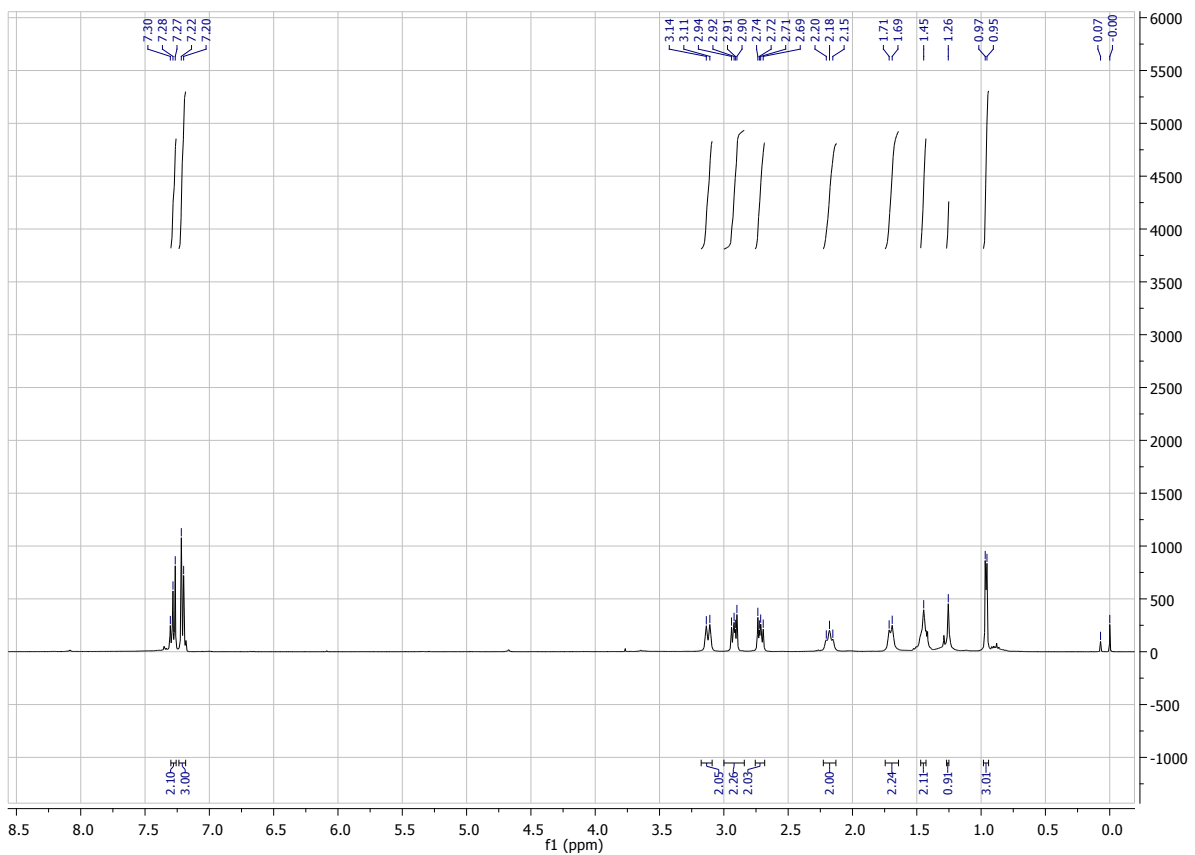

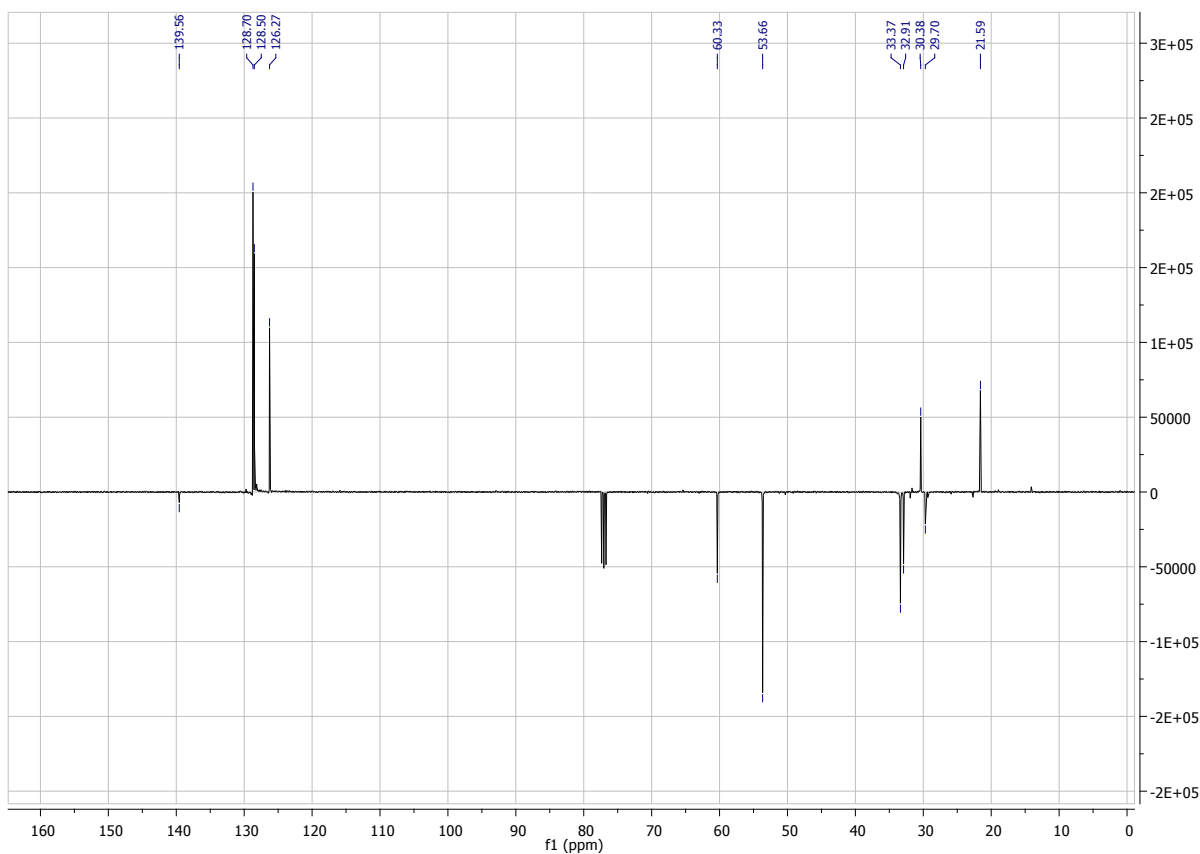

### 3-methyl-1-phenethylpiperidine 7m

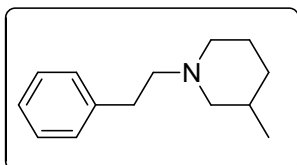

**mp: 128°C-130°C**

**NMR Yield of corresponding enamine = 78 %**

**Yield (isolated) = 74 %**

**<sup>1</sup>H NMR (400 MHz, CDCl<sub>3</sub>):** δ 1.26 (s, 3H), 1.48 (s, 5H), 1.84-1.98(m, 4H), 3.13-3.24 (m, 4H), 7.26 (s, 3H), 7.31-7.32 (d, *J* = 5.9 Hz, 2H).

**<sup>13</sup>C NMR (100 MHz, CDCl<sub>3</sub>):** δ 17.8, 22.6, 22.9, 31.3, 52.4, 54.1, 99.8, 127.4, 128.6, 129.0, 136.2.

**GC/MS:** rt = 09.07 min, M/Z = 203

**HRMS:** 204.1160 (M+H). Theoretical: 204.1158

**Purification** Washing with diethyl ether.

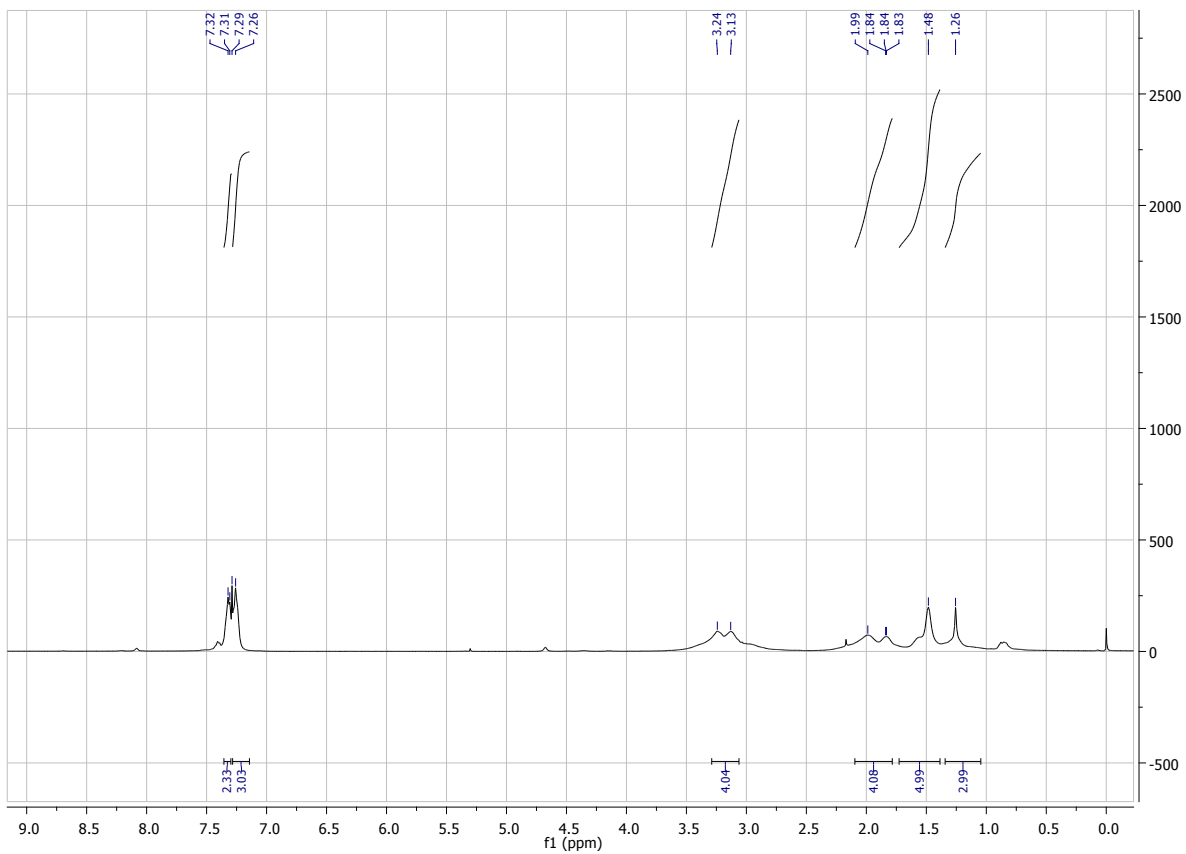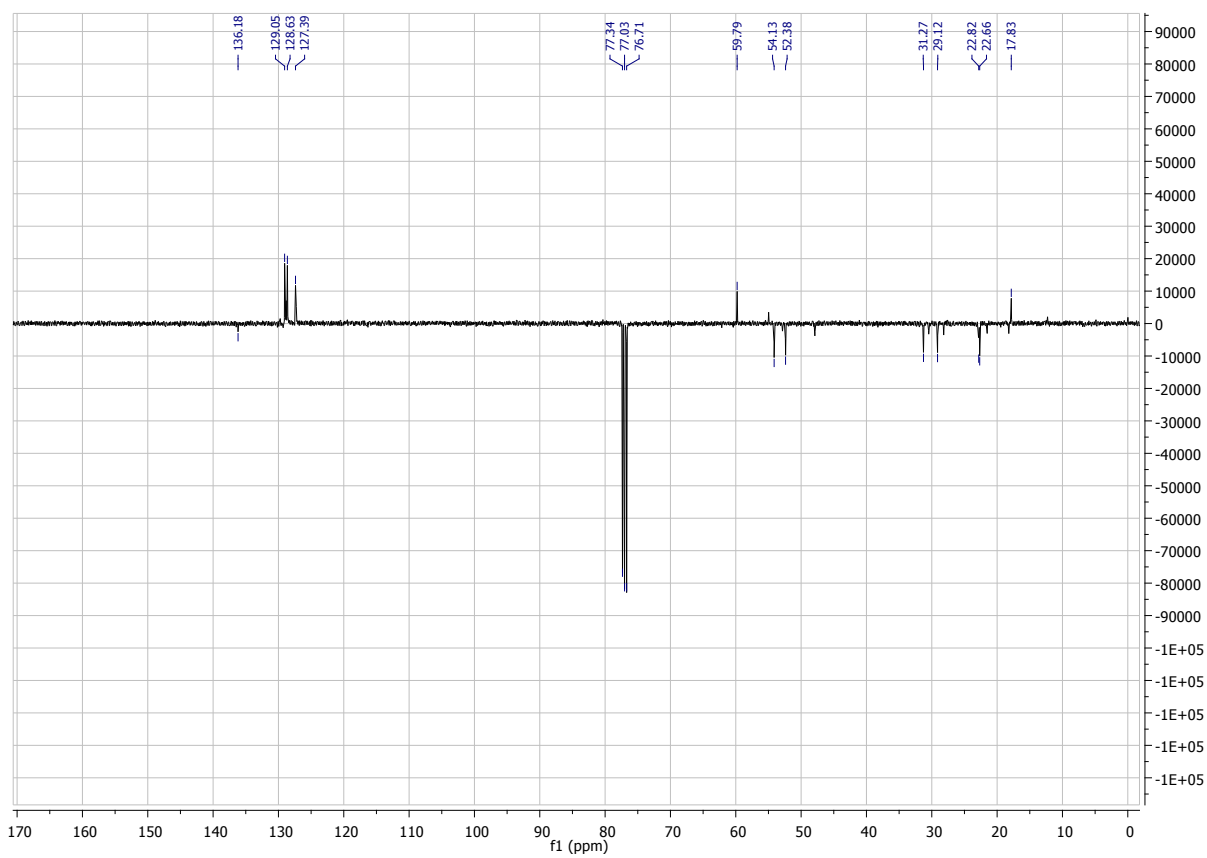

**2-methyl-1-phenethylpiperidine 7n**

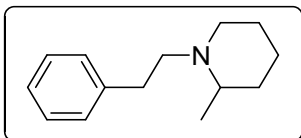

**mp: 145°C-155°C**

**NMR Yield of corresponding enamine = 80 %**

**Yield (isolated) = 76 %**

**<sup>1</sup>H NMR (400 MHz, CDCl<sub>3</sub>):** δ 0.97-0.98 (d, *J* = 6.2 Hz, 3H), 1.06-1.09 (d, *J* = 12.2 Hz, 1H), 1.86-1.95 (m, 2H), 2.22-2.28 (t, *J* = 11.1 Hz, 1H), 2.31-2.43 (m, 1H), 2.45-2.62 (m, 2H), 3.08-3.19 (m, 2H), 3.26-3.3 (dd, *J*<sup>1</sup> = 5.4 Hz, *J*<sup>2</sup> = 10.8 Hz, 2H), 3.46-3.6 (dd, *J*<sup>1</sup> = 9.9 Hz, *J*<sup>2</sup> = 48.5 Hz, 2H), 7.25-7.27 (m, 3H), 7.3-7.34 (m, 2H).

**<sup>13</sup>C NMR (100 MHz, CDCl<sub>3</sub>):** δ 18.9, 22.7, 28.8, 30.1, 30.9, 53.0, 59.0, 127.9, 128.7, 129.0, 136.3.

**GC/MS:** rt = 08.66 min, M/Z = 203

**HRMS:** 204.1754 (M+H). Theoretical: 204.1752

**Purification:** Washing with diethyl ether.

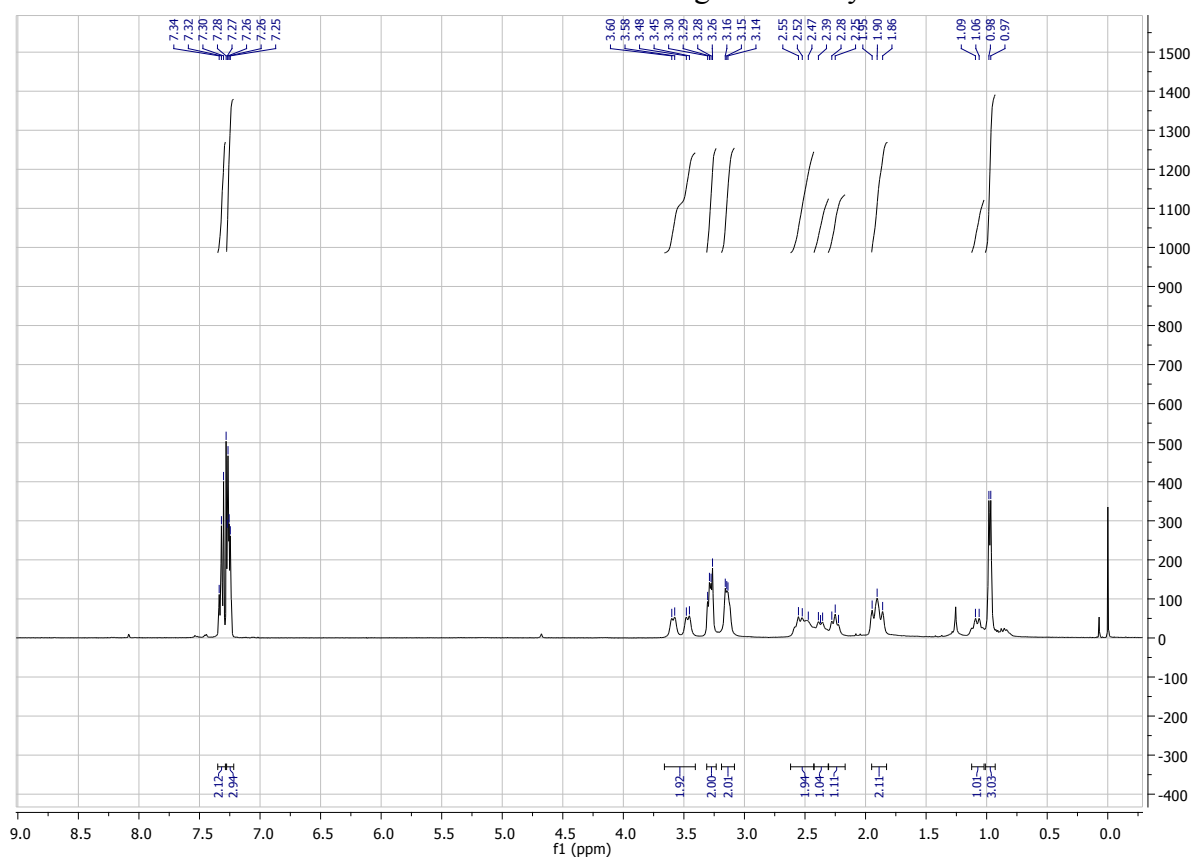



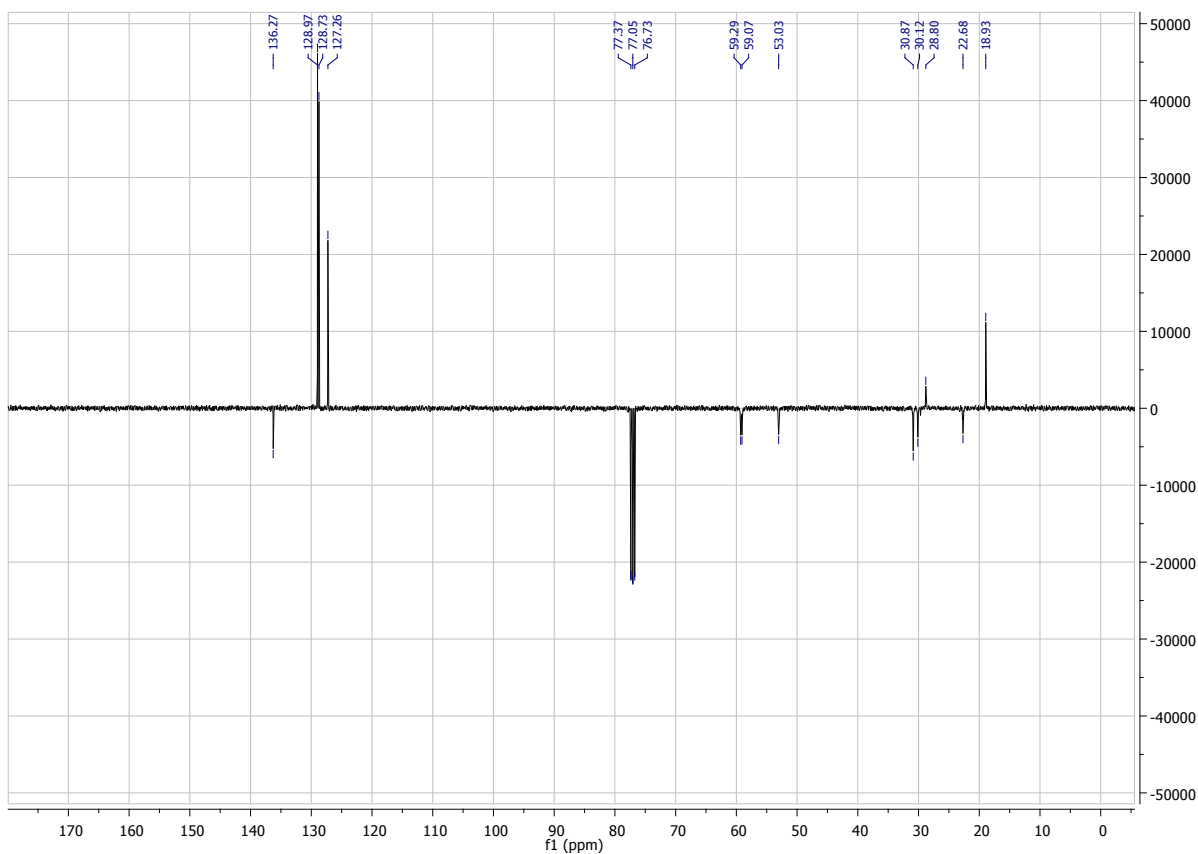

**1-phenethylazepane 7o**

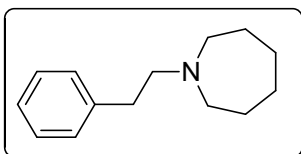

**mp: 148°C-150°C**

**NMR Yield of corresponding enamine = 83 %**

**Yield (isolated) = 76 %**

**<sup>1</sup>H NMR (400 MHz, CDCl<sub>3</sub>):** δ 1.26 (s, 4H), 1.72 (s, 4H), 2.94 (s, 4H), 3.12-3.18 (m, 4H), 7.23-7.25 (m, 3H), 7.29-7.32 (m, 2H).

**<sup>13</sup>C NMR (100 MHz, CDCl<sub>3</sub>):** δ 24.5, 26.8, 29.4, 31.5, 54.8, 99.0, 126.9, 128.7, 128.8, 137.3.

**GC/MS:** rt = 08.67 min, M/Z = 203.17

**HRMS:** 204.1753 (M+H). Theoretical: 204.1752

**Purification:** Washing with diethyl ether.

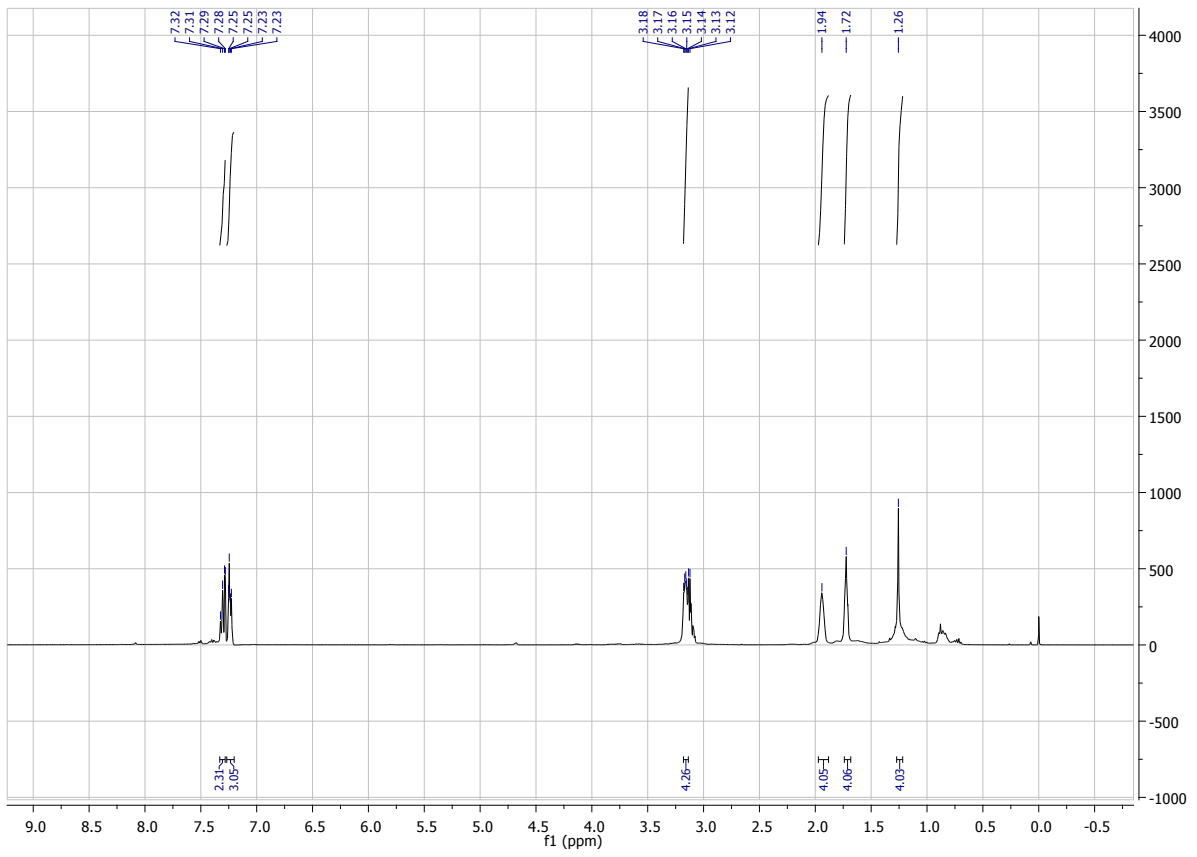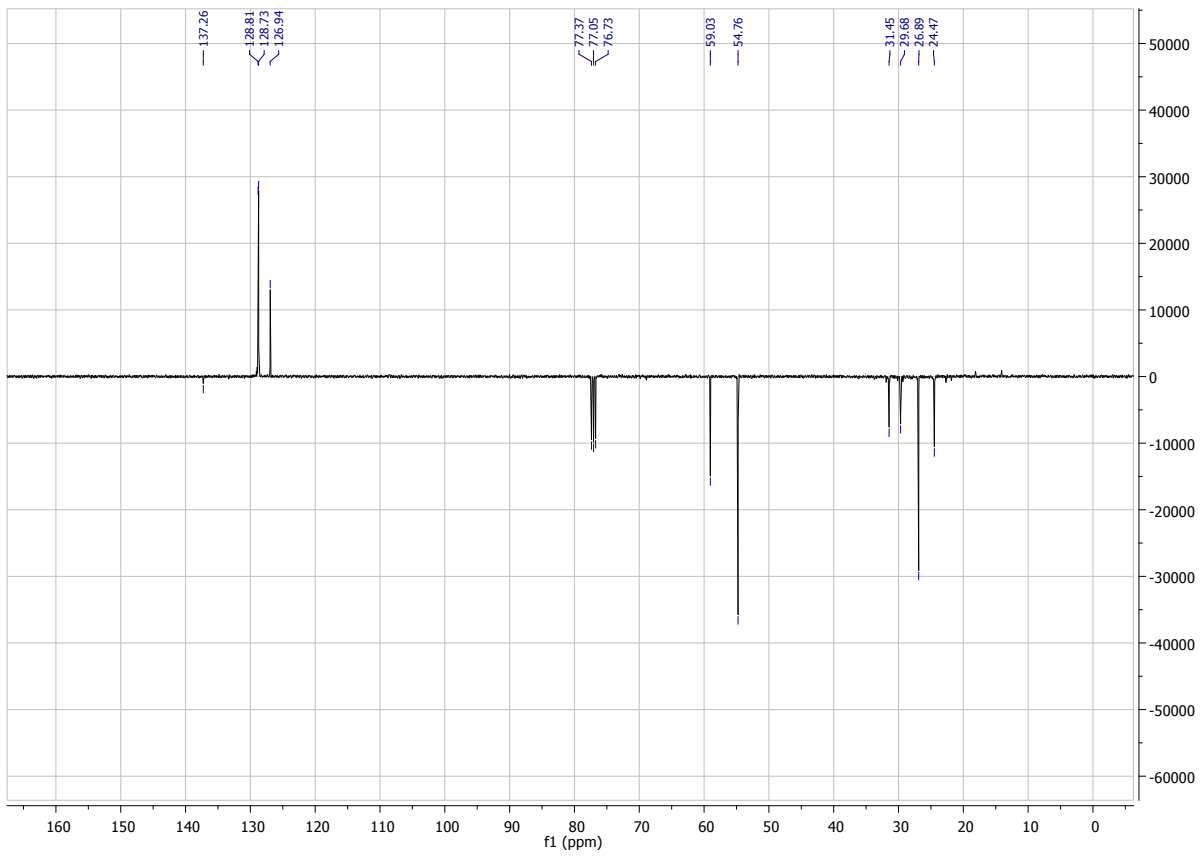

*N*-(4-methylphenethyl)-*N*-propylpropan-1-amine 7p

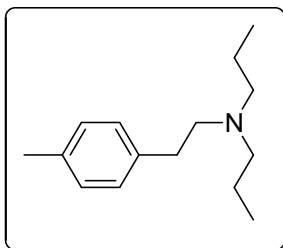

**NMR Yield of corresponding enamine = 67 %**

**Yield (isolated) = 60 %**

**<sup>1</sup>H NMR (400 MHz, CDCl<sub>3</sub>):** δ 0.80-0.93 (t, *J* = 7.4 Hz, 6H), 1.64-1.54 (m, 4H), 2.33 (s, 3H), 2.46-2.50 (m, 4H), 2.67-7.30 (m, 4H), 7.11 (s, 4H).

**<sup>13</sup>C NMR (100 MHz, CDCl<sub>3</sub>):** δ 11.0, 19.3, 20.0, 32.0, 55.2, 55.3, 127.6, 128.0, 136.8.

**GC/MS:** rt = 08.65 min, *M/Z* = 219.20

**HRMS:** 220.2066 (*M+H*). Theoretical: 220.2065

**Purification:** by silica gel column chromatography, eluent: Pentane/ ethyl acetate 70:30.

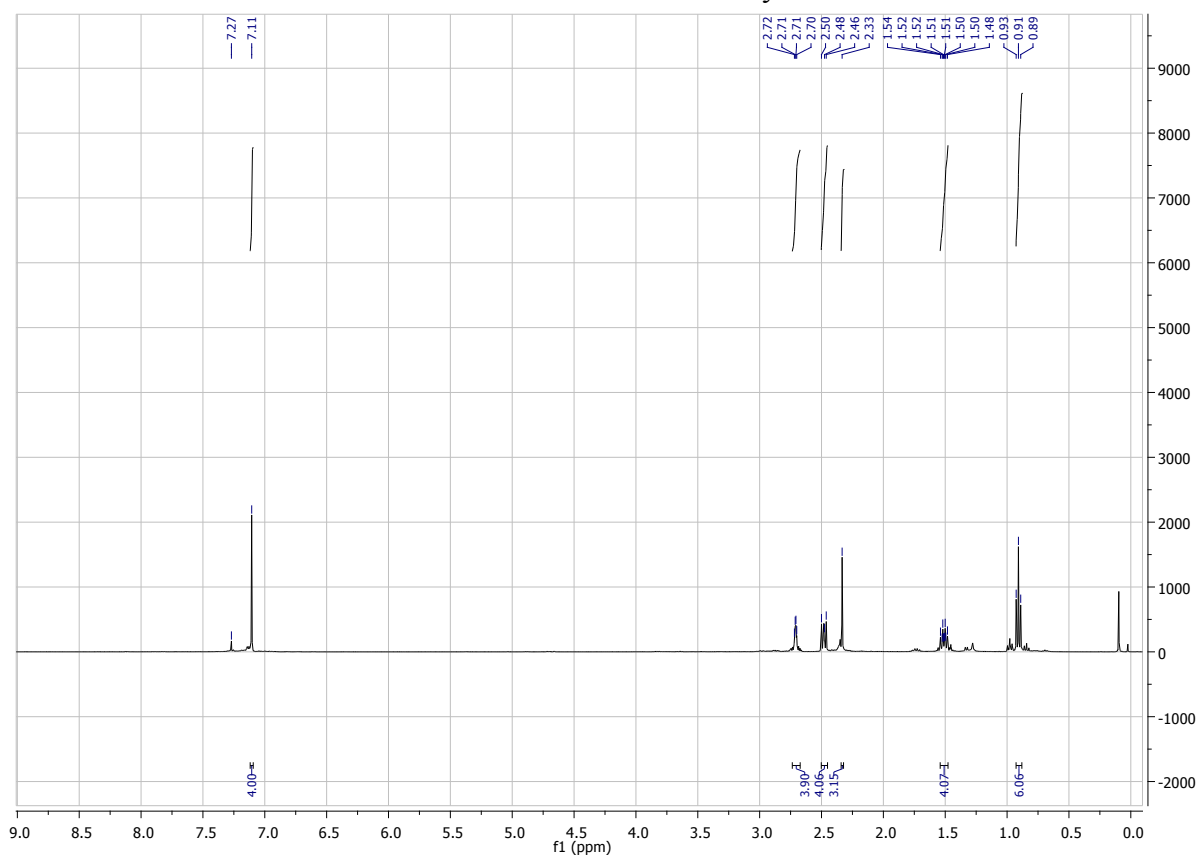

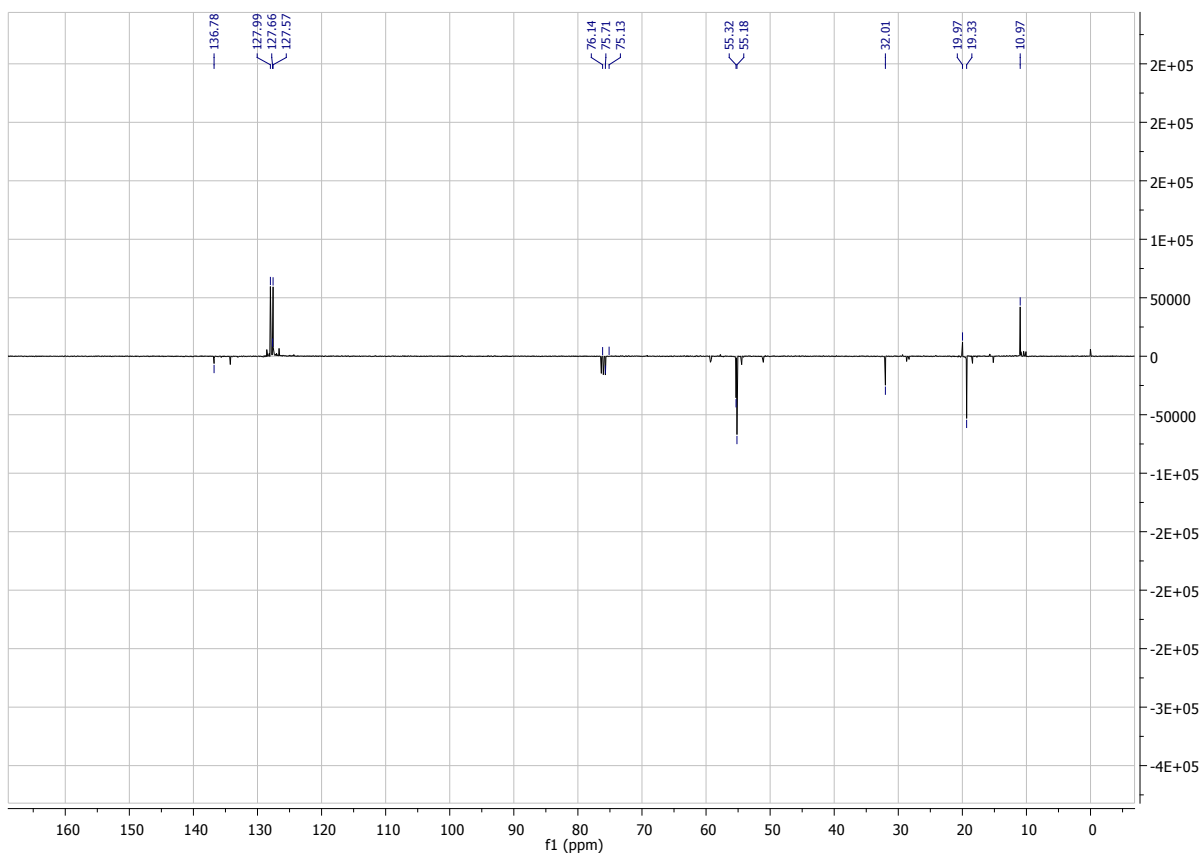

*N*-(3-methylphenethyl)-*N*-propylpropan-1-amine **7q**

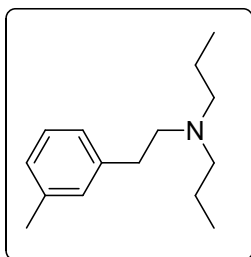

**NMR Yield of corresponding enamine = 82 %**

**Yield (isolated) = 78 %**

**<sup>1</sup>H NMR (400 MHz, CDCl<sub>3</sub>):** δ 0.93-0.97 (t, *J* = 7.4 Hz, 6H), 1.70-1.76 (m, 4H), 2.31(s, 3H), 2.79-2.84 (m, 4H), 2.95-3.03 (m, 3H), 6.99-7.04 (m, 3H), 7.16-7.20 (t, *J* = 7.8 Hz, 1H).

**<sup>13</sup>C NMR (100 MHz, CDCl<sub>3</sub>):** δ 11.5, 18.0, 21.3, 29.7, 31.1, 54.6, 54.7, 125.6, 127.5, 128.6, 129.5, 138.4.

**GC/MS:** rt = 08.6 min, M/Z = 219.2

**HRMS:** 220.2066 (M+H). Theoretical: 220.2065

**Purification:** by silica gel column chromatography, eluent: Pentane/ ethyl acetate 60:40.

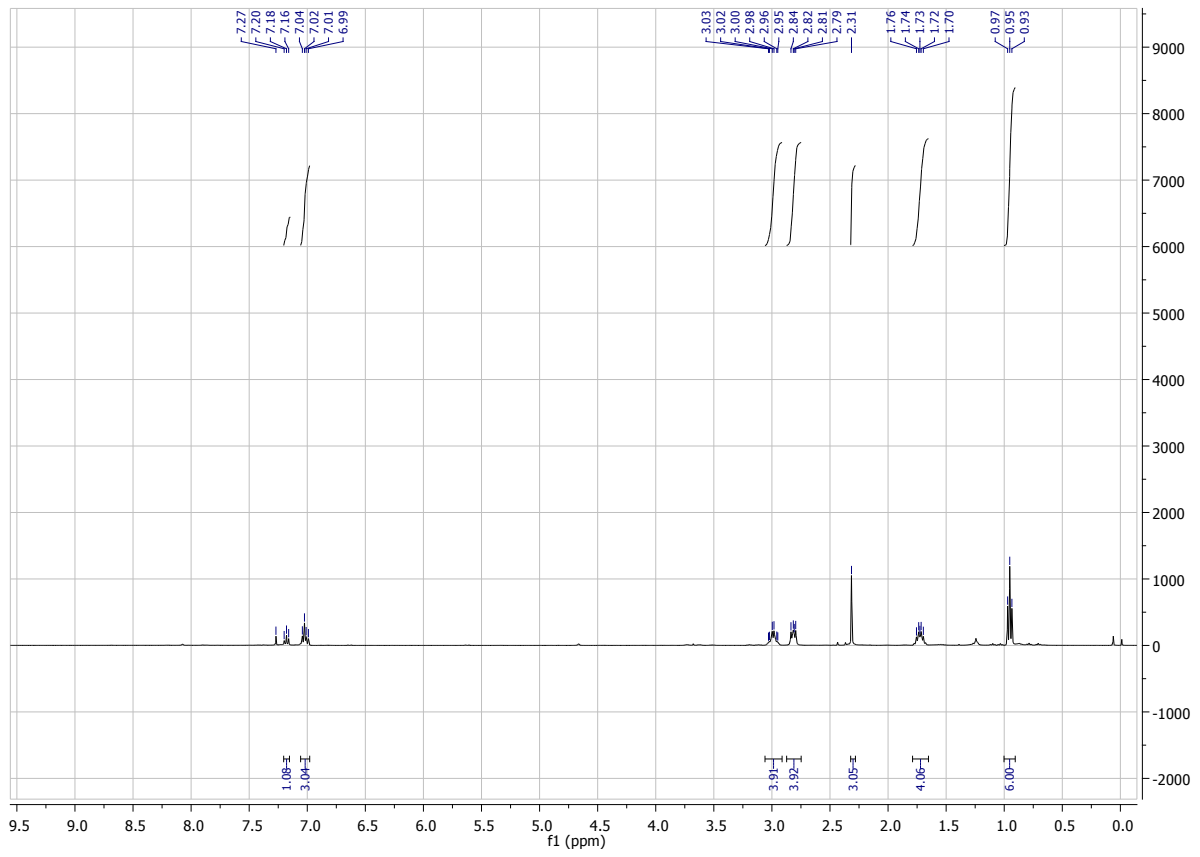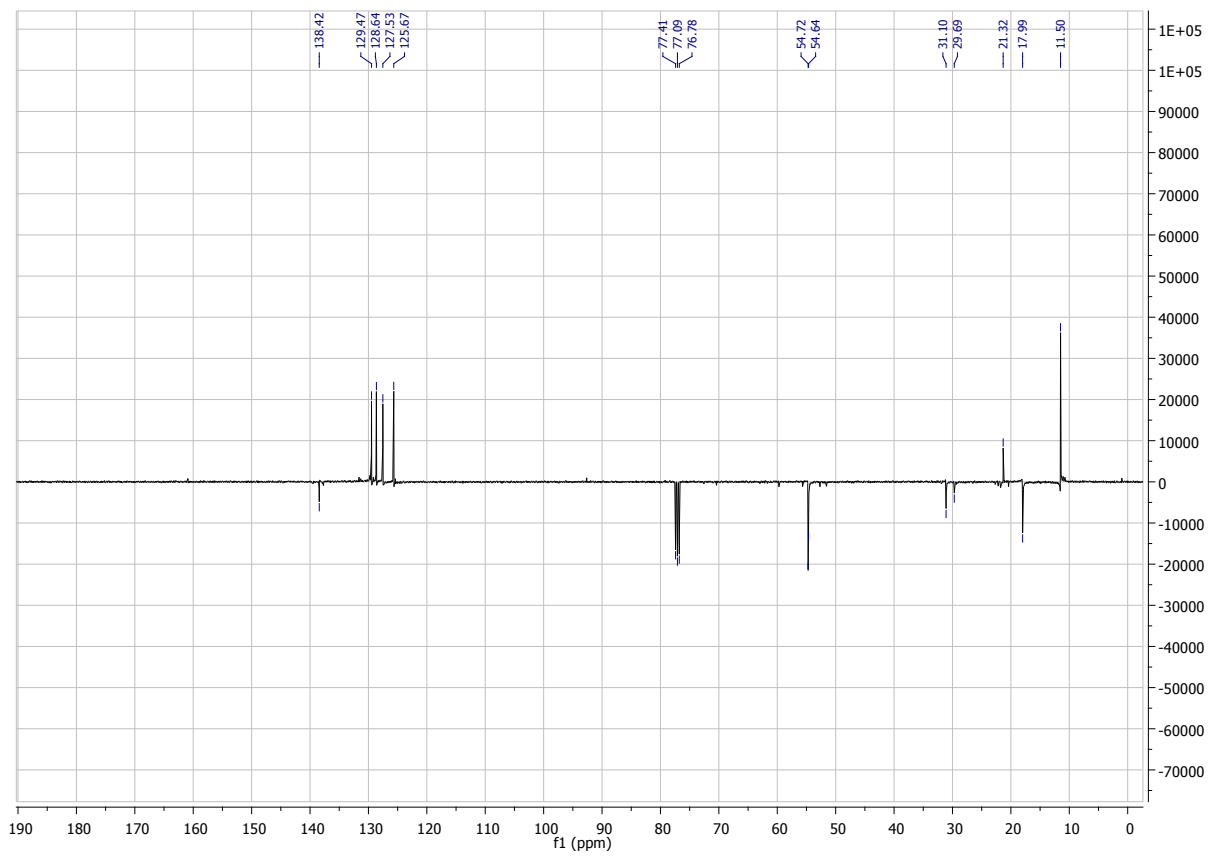

*N*-(4-(*tert*-butyl)phenethyl)-*N*-propylpropan-1-amine **7r**

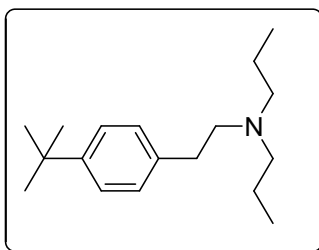

**NMR Yield of corresponding enamine = 73 %**

**Yield (isolated) = 70 %**

**<sup>1</sup>H NMR (400 MHz, CDCl<sub>3</sub>):** δ 0.88-0.92 (t, *J* = 7.4 Hz, 6H), 1.32 (s, 12H), 1.48-1.54 (m, 4H), 2.45-2.5 (m, 4H), 2.72 (s, 4H), 7.14-7.16 (d, *J* = 8.3 Hz, 2H), 7.31-7.33 (d, *J* = 8.3 Hz, 2H).

**<sup>13</sup>C NMR (100 MHz, CDCl<sub>3</sub>):** δ 12.0, 16.2, 20.3, 31.4, 32.9, 56.2, 125.2, 128.4, 134.2, 137.8, 148.6.

**GC/MS:** rt = 09.78 min, M/Z = 261.25

**HRMS:** 262.2539 (M+H). Theoretical: 262.2535

**Purification:** by silica gel column chromatography, eluent: Pentane/ ethyl acetate 60:40.

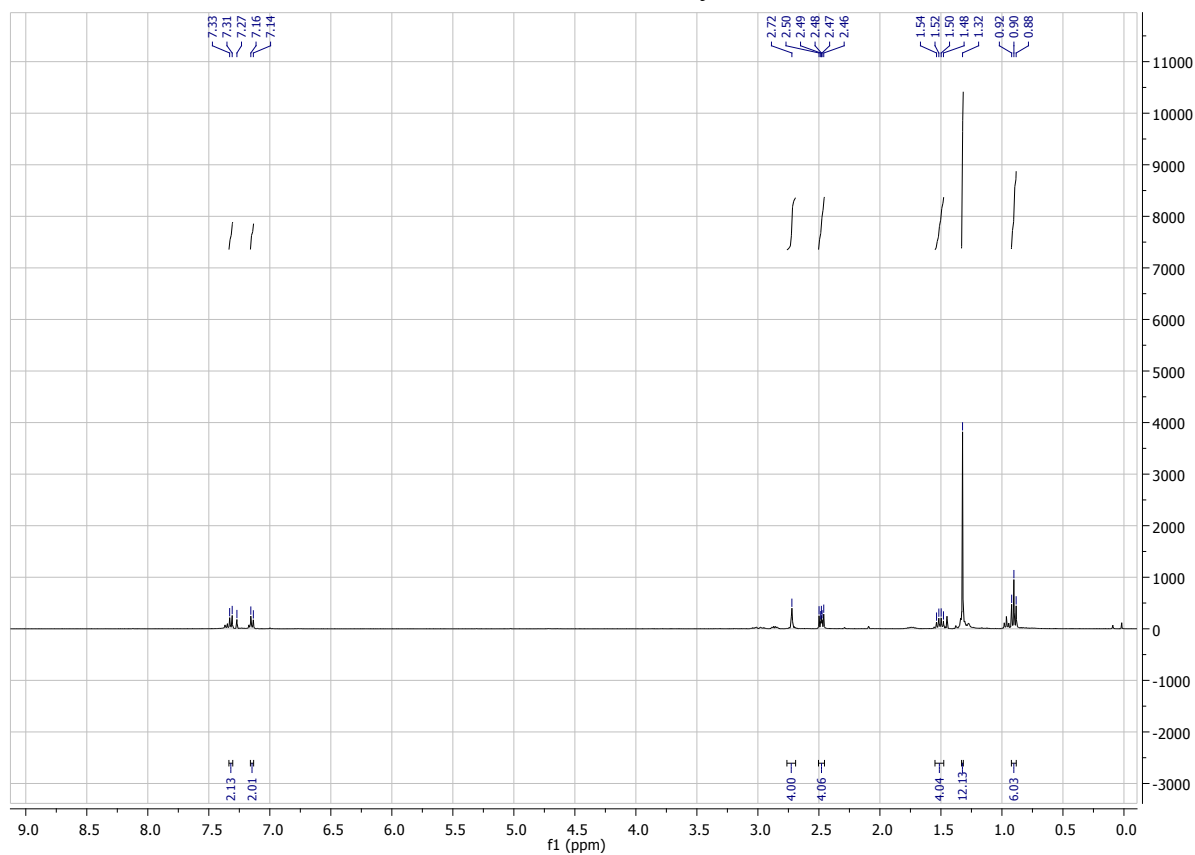

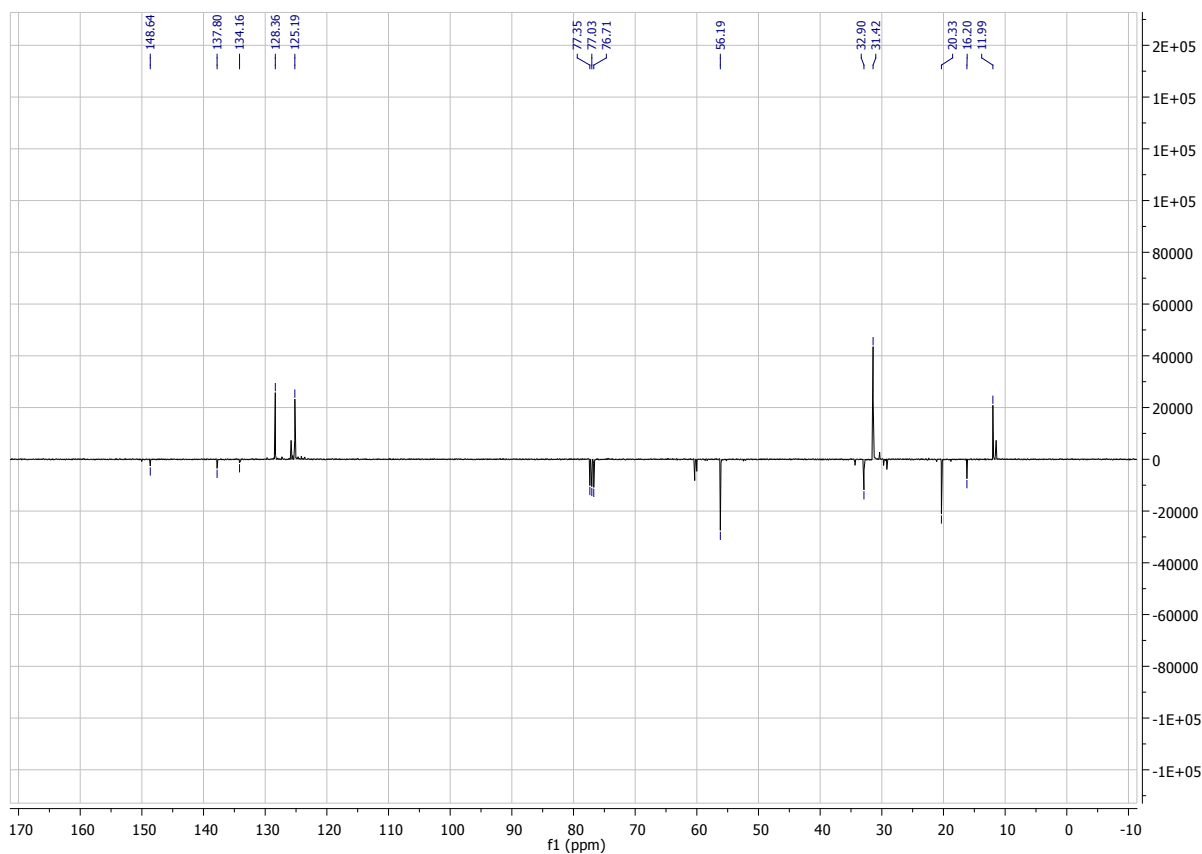

*N*-(4-bromophenethyl)-*N*-propylpropan-1-amine 7s

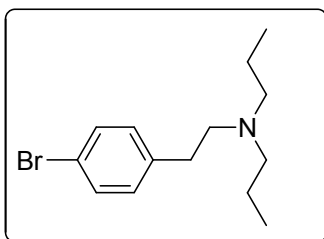

**NMR Yield of corresponding enamine = 96 %**

**Yield (isolated) = 90 %**

**<sup>1</sup>H NMR (400 MHz, CDCl<sub>3</sub>):** δ 0.85-0.89 (t, *J* = 7.4 Hz, 6H), 1.43-1.48 (m, 4H), 2.40-2.44 (m, 4H), 2.62-2.69 (m, 4H), 7.05-7.07 (d, *J* = 8.4 Hz, 2H), 7.37-7.39 (d, *J* = 8.8 Hz, 2H).

**<sup>13</sup>C NMR (100 MHz, CDCl<sub>3</sub>):** δ 12.0, 20.4, 33.1, 56.0, 56.2, 119.5, 130.5, 131.3, 140.0.

**GC/MS:** rt = 09.72 min, *M/Z* = 283.09

**HRMS:** 284.1020 (*M*+*H*). Theoretical: 284.1014

**Purification:** by silica gel column chromatography, eluent: Pentane/ ethyl acetate 85:25.

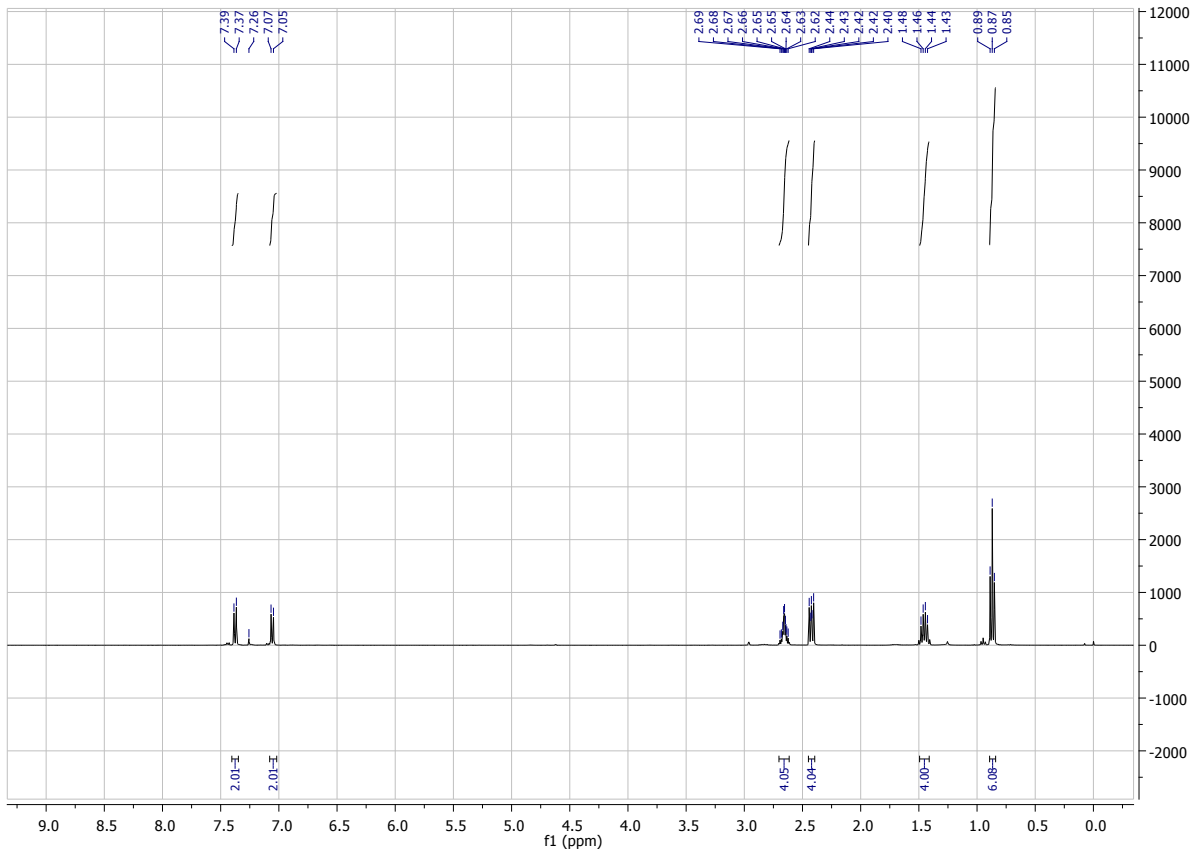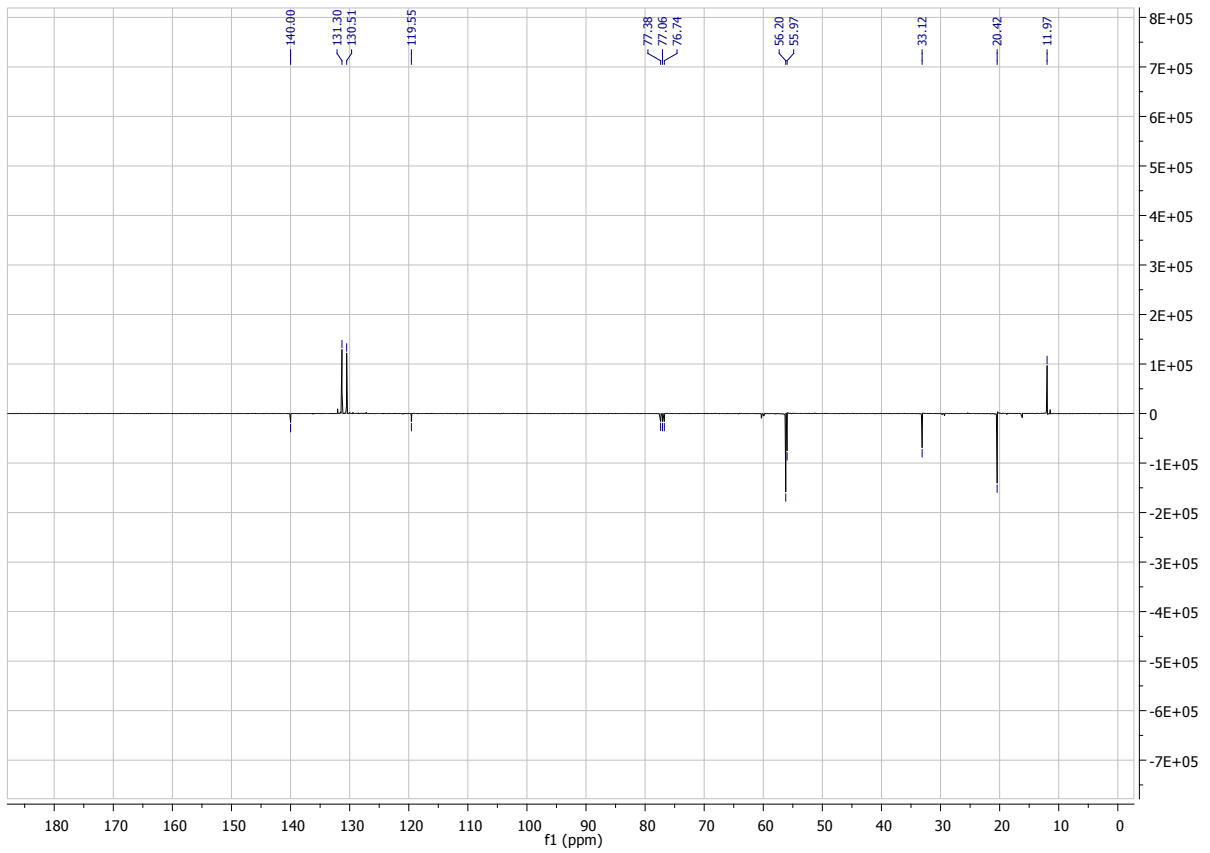



*N*-(4-fluorophenethyl)-*N*-propylpropan-1-amine 7t

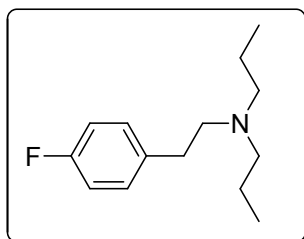

**NMR Yield of corresponding enamine = 79 %**

**Yield (isolated) = 73 %**

**<sup>1</sup>H NMR (400 MHz, CDCl<sub>3</sub>):** δ 0.87-0.90 (t, *J* = 7.4 Hz, 6H), 1.45-1.50 (m, 4H), 2.41-2.48 (m, 4H), 2.61-2.77 (m, 4H), 6.94-6.98 (t, *J* = 8.8 Hz, 2H), 7.13-7.15 (dd, *J*<sup>1</sup> = 5.5 Hz, *J*<sup>2</sup> = 8.6 Hz, 2H).

**<sup>13</sup>C NMR (100 MHz, CDCl<sub>3</sub>):** δ 11.9, 20.4, 32.9, 56.2, 56.3, 114.8-115.1 (d, *J*<sub>C-F</sub> = 84 Hz), 129.9-130.1 (d, *J*<sub>C-F</sub> = 7.9 Hz), 160.1, 162.5.

**GC/MS:** rt = 08.14 min, *M/Z* = 223

**HRMS:** 224.1816 (M+H). Theoretical: 224.1815

**Purification:** by silica gel column chromatography, eluent: Pentane/ ethyl acetate 70:30.

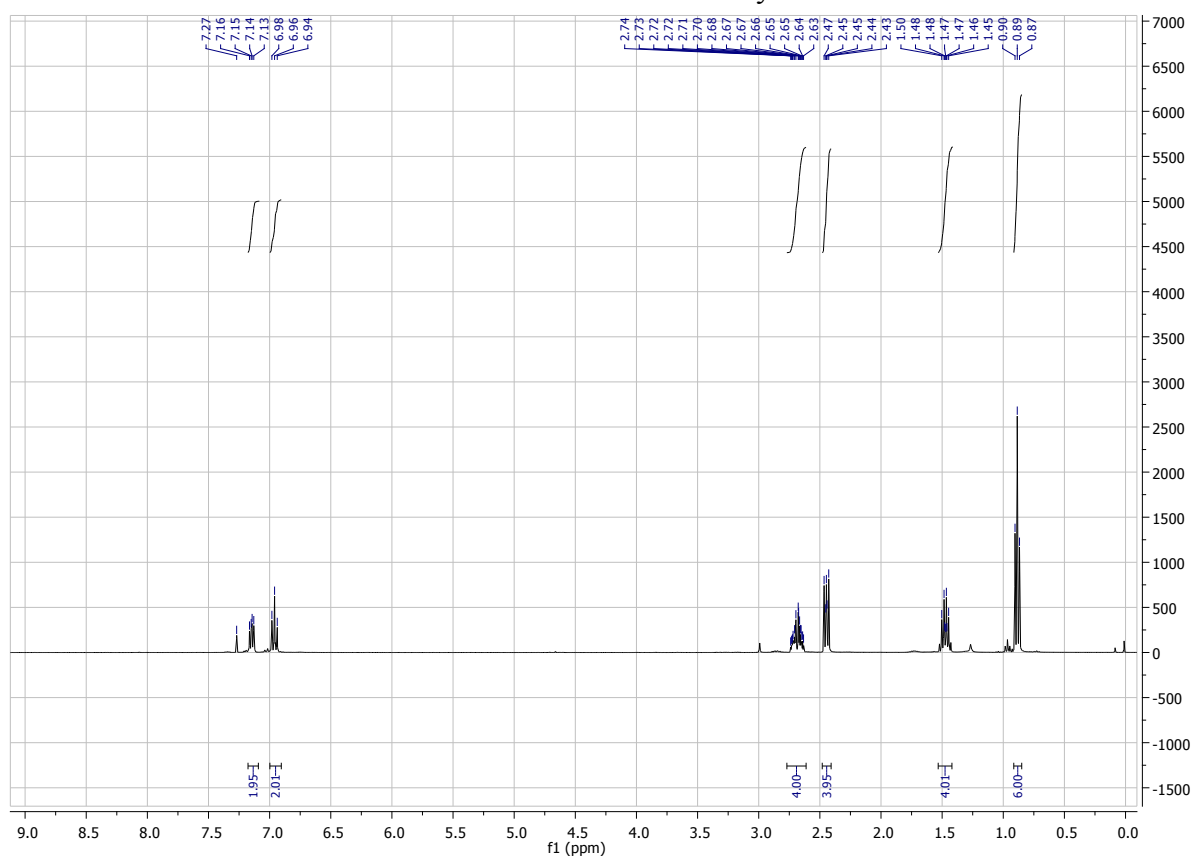

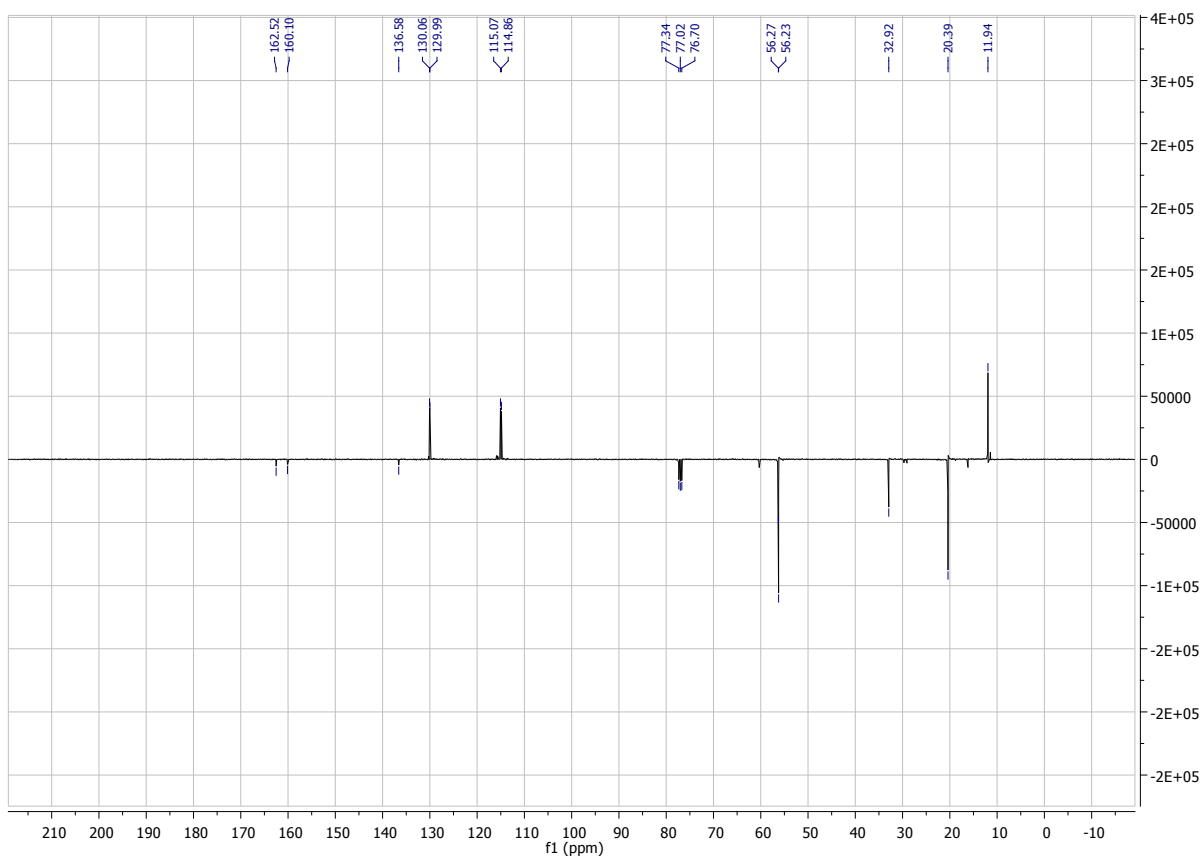

**Methyl 4-(2-(dipropylamino) ethyl)benzoate 7u**

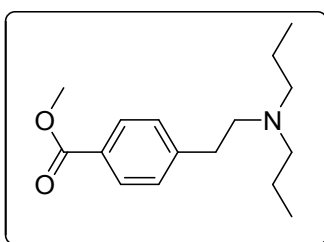

**NMR Yield of corresponding enamine = 91 %**

**Yield (isolated) = 85 %**

**<sup>1</sup>H NMR (400 MHz, CDCl<sub>3</sub>):** δ 0.85-0.88 (t, *J* = 7.4 Hz, 6H), 1.44-1.5 (m, 4H), 2.44-2.48 (m, 4H), 2.67-2.83 (m, 4H), 3.88 (s, 3H), 7.24-7.26 (d, *J* = 8 Hz, 2H), 7.93-7.95 (d, *J* = 8.3 Hz, 2H).

**<sup>13</sup>C NMR (100 MHz, CDCl<sub>3</sub>):** δ 11.9, 20.2, 33.5, 51.9, 55.6, 56.0, 127.9, 128.7, 129.6, 146.3, 167.1.

**GC/MS:** rt = 10.48 min, M/Z = 263.19

**HRMS:** 264.1964 (M+H). Theoretical: 264.1964

**Purification:** by silica gel column chromatography, eluent: Pentane/ ethyl acetate 80:20.

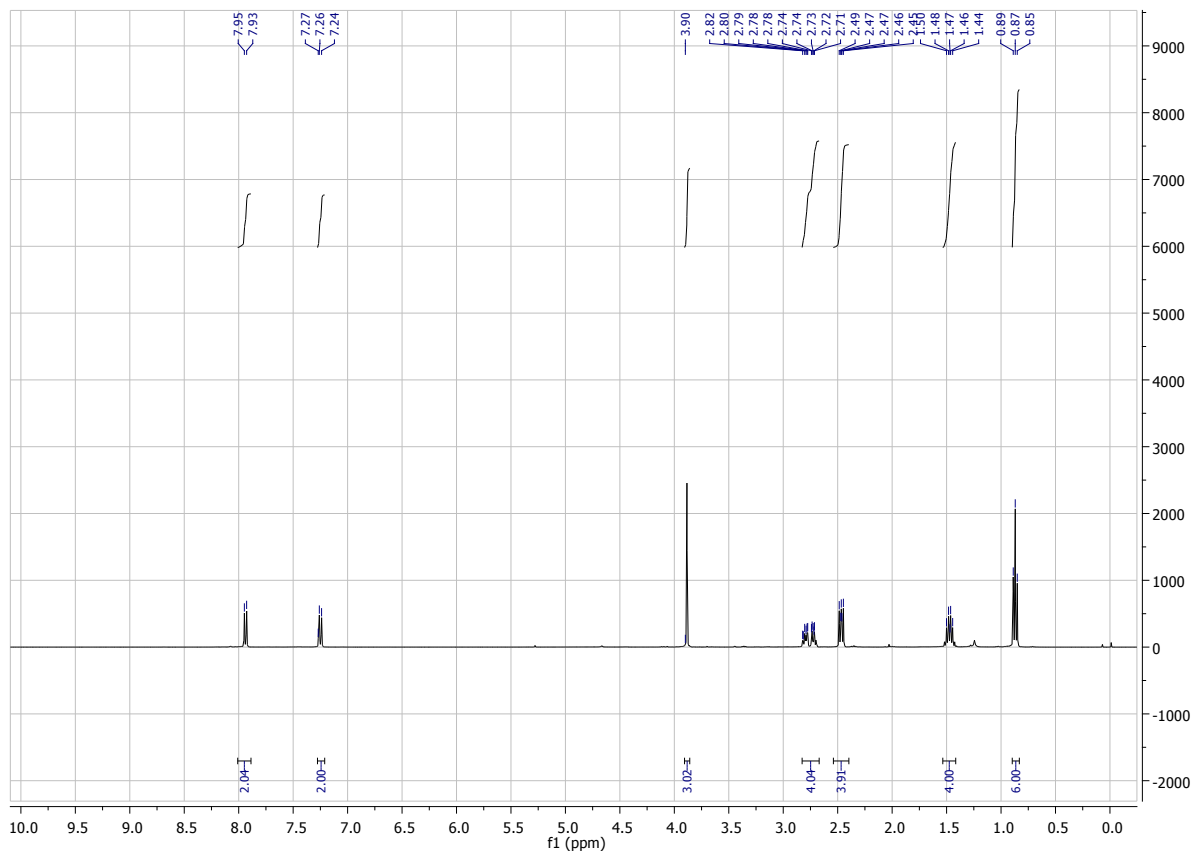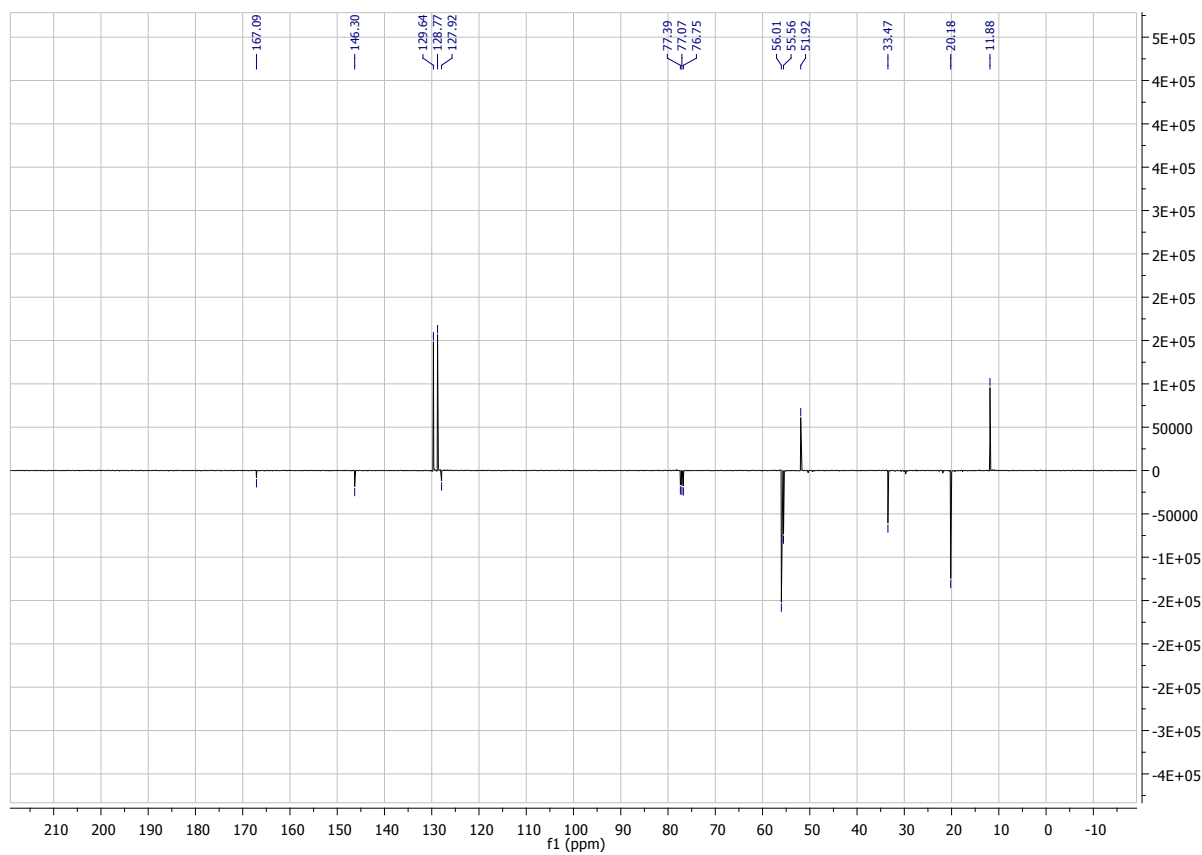

*N*-(4-methylthio)phenethyl)-*N*-propylpropan-1-amine 7v

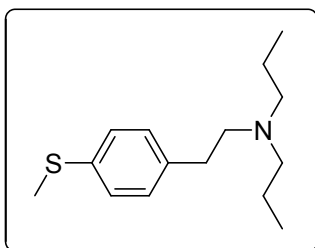

**NMR Yield of corresponding enamine = 69 %**

**Yield (isolated) = 60 %**

**<sup>1</sup>H NMR (400 MHz, CDCl<sub>3</sub>):** δ 0.87-0.91 (t, *J* = 7.4 Hz, 6H), 1.48-1.51 (m, 4H), 2.42-2.5 (m, 7H), 2.63-2.75 (m, 4H), 7.12-7.14 (d, *J* = 8.3 Hz, 2H), 7.19-7.21 (d, *J* = 8.3 Hz, 2H).

**<sup>13</sup>C NMR (100 MHz, CDCl<sub>3</sub>):** δ 12.0, 15.4, 19.4, 32.0, 55.1, 55.2, 126.3, 128.3, 134.3, 137.1.

**GC/MS:** rt = 10.4 min, M/Z = 251

**HRMS:** 252.1787 (M+H). Theoretical: 252.1786

**Purification:** by silica gel column chromatography, eluent: Pentane/ ethyl acetate 60:40.

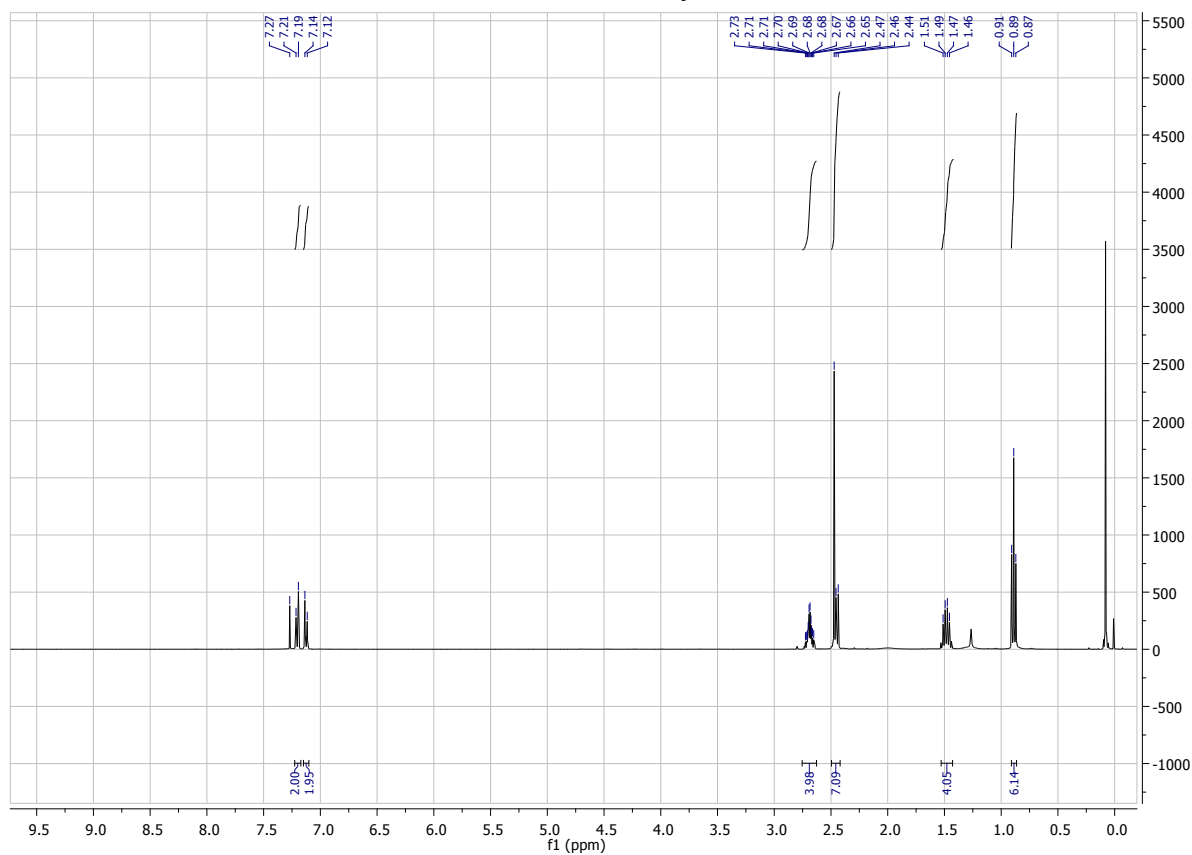

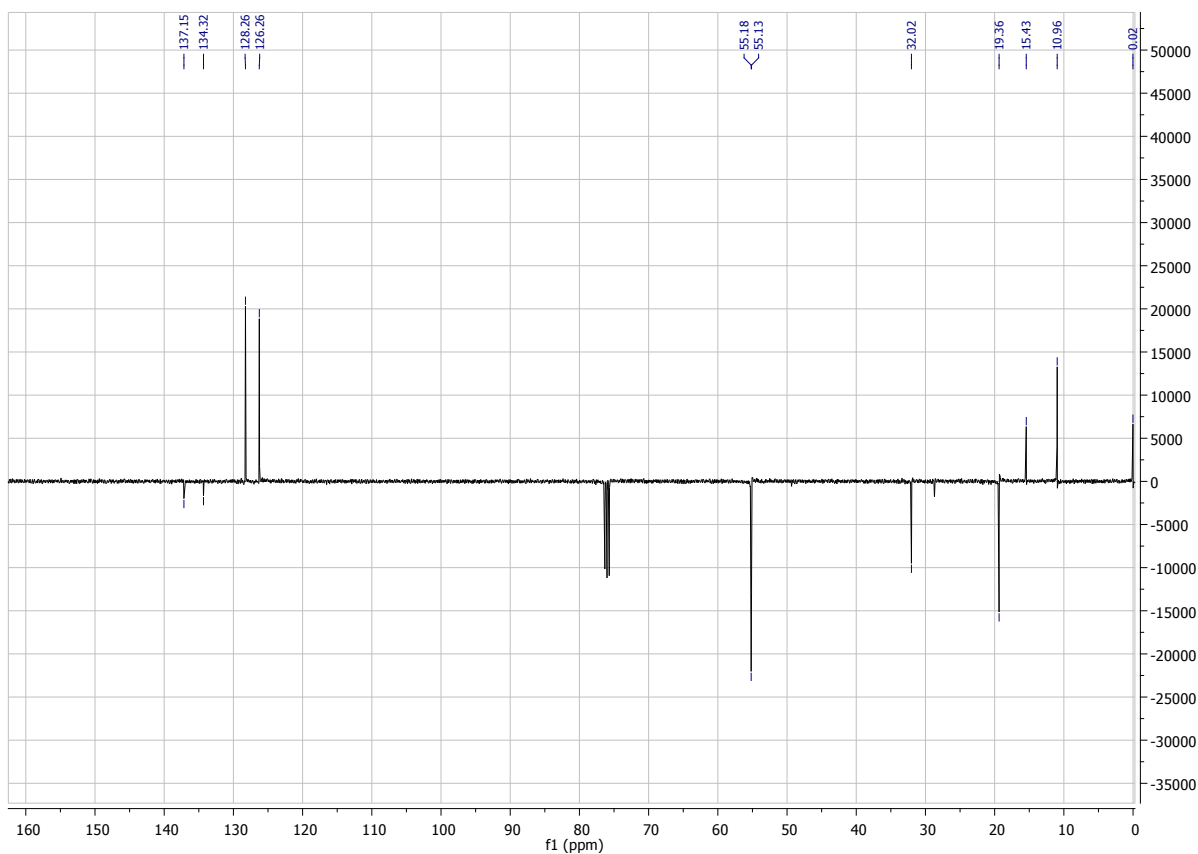

*N*-(2-(naphthalene-1-yl)ethyl)-*N*-propylpropan-1-amine 7w

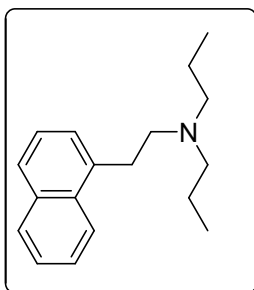

**NMR Yield of corresponding enamine = 84 %**

**Yield (isolated) = 80 %**

**<sup>1</sup>H NMR (400 MHz, CDCl<sub>3</sub>):** δ 0.92-0.96 (t, *J* = 7.4 Hz, 6H), 1.49-1.59 (m, 4H), 2.51-2.59 (m, 4H), 2.79-2.87 (m, 4H), 3.19-3.3 (m, 4H), 7.34-7.44 (m, 2H), 7.48-7.54 (m, 2H), 7.71-7.73 (d, *J* = 8.1 Hz, 1H), 7.85-7.87 (d, *J* = 7.3 Hz, 1H), 8.06-8.08 (d, *J* = 8.5 Hz, 1H).

**<sup>13</sup>C NMR (100 MHz, CDCl<sub>3</sub>):** δ 12.0, 20.5, 30.9, 55.4, 56.3, 123.7, 125.4, 125.6, 125.8, 126.5, 126.6, 128.8, 132, 133.9, 137.1.

**GC/MS:** rt = 10.85 min, M/Z = 255

**HRMS:** 256.2067 (M+H). Theoretical: 256.2065

**Purification:** by silica gel column chromatography, eluent: Pentane/ ethyl acetate 70:30.

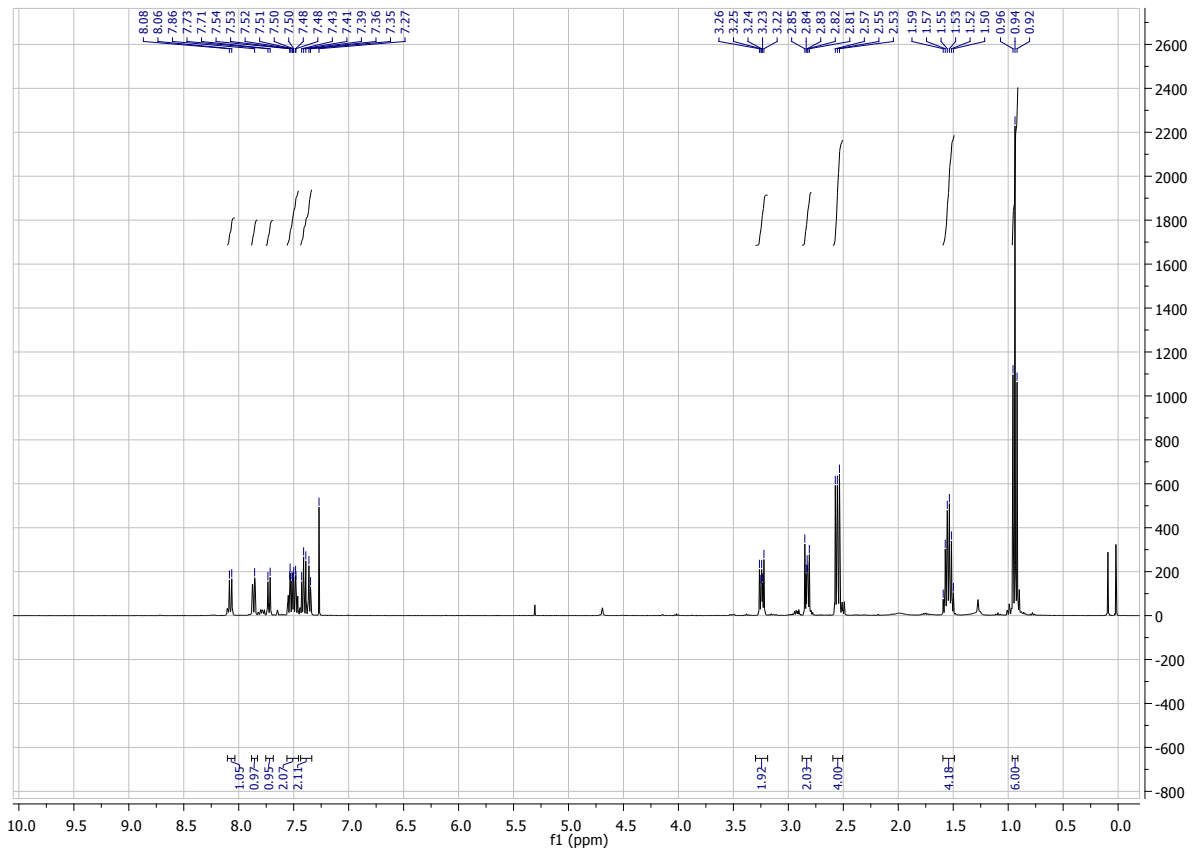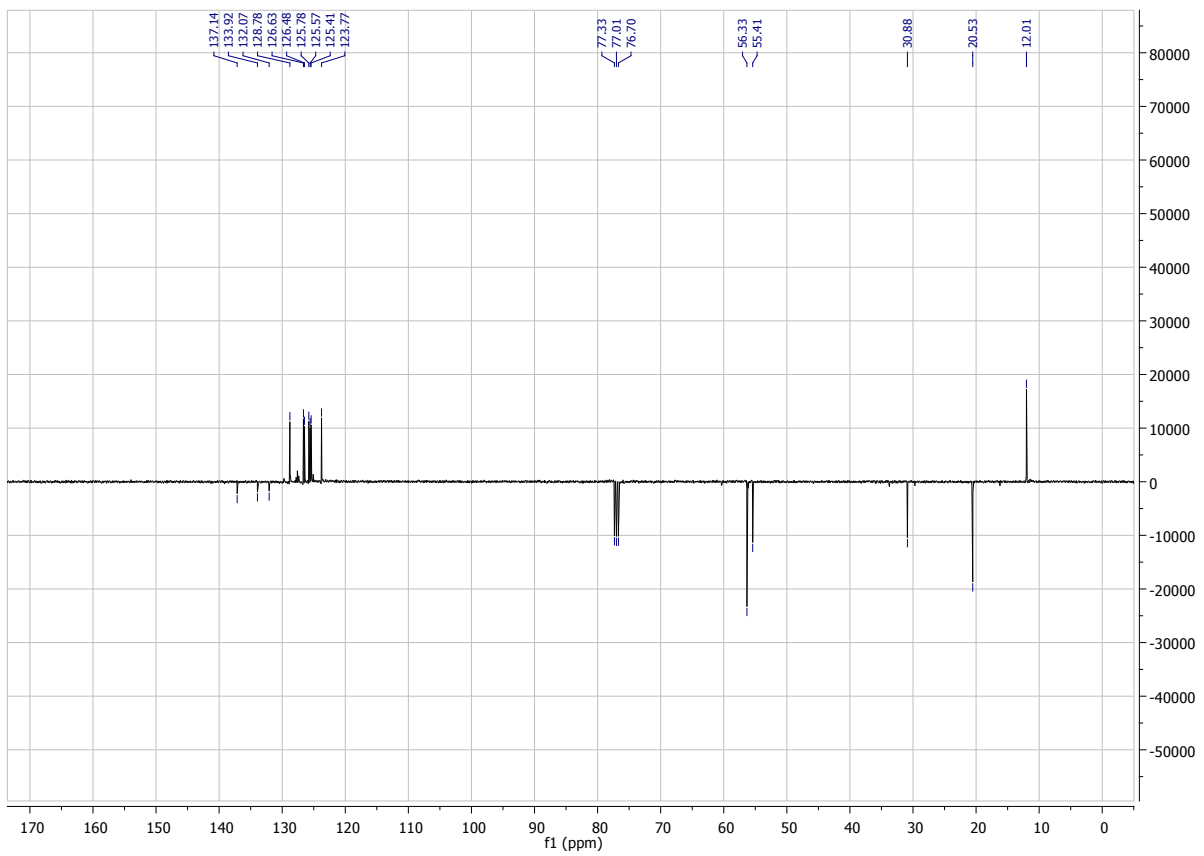

(E)-N-propyl-N-(2-(pyridin-2-yl) vinyl)propan-1-amine 3x

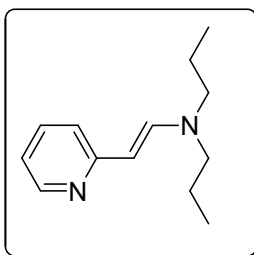

**NMR Yield of corresponding enamine = 100 %**

**Yield (isolated) = 98 %**

**<sup>1</sup>H NMR (400 MHz, CDCl<sub>3</sub>):** δ 0.89-0.92 (t, *J* = 7.4 Hz, 6H), 1.56-1.65 (m, 4H), 3.09-3.12 (dd, *J* = 8.2Hz, 2*J* = 6.9Hz, 4H), 5.13-5.16 (d, *J* = 13.4 Hz, 1H), 6.71-6.74 (ddd, *J* = 7.3 Hz, *J* = 4.9 Hz, *J* = 1.1Hz, 1H), 6.84-6.86 (dt, *J* = 8.1 Hz, *J* = 1Hz, 1H), 7.35-7.39 (ddd, *J* = 8 Hz, *J* = 7.3 Hz, *J* = 1.9, 1H), 7.43-7.47 (d, *J* = 13.4 Hz, 1H), 8.27-8.29 (m, 2H).

**<sup>13</sup>C NMR (100 MHz, CDCl<sub>3</sub>):** δ 11.3, 21.2, 53.7, 94.2, 116.9, 118.6, 135.9, 142.4, 148.6, 159.

**GC/MS:** rt = 09.7 min, M/Z = 204

**HRMS:** 205.1704 (M+H). Theoretical: 205.1705

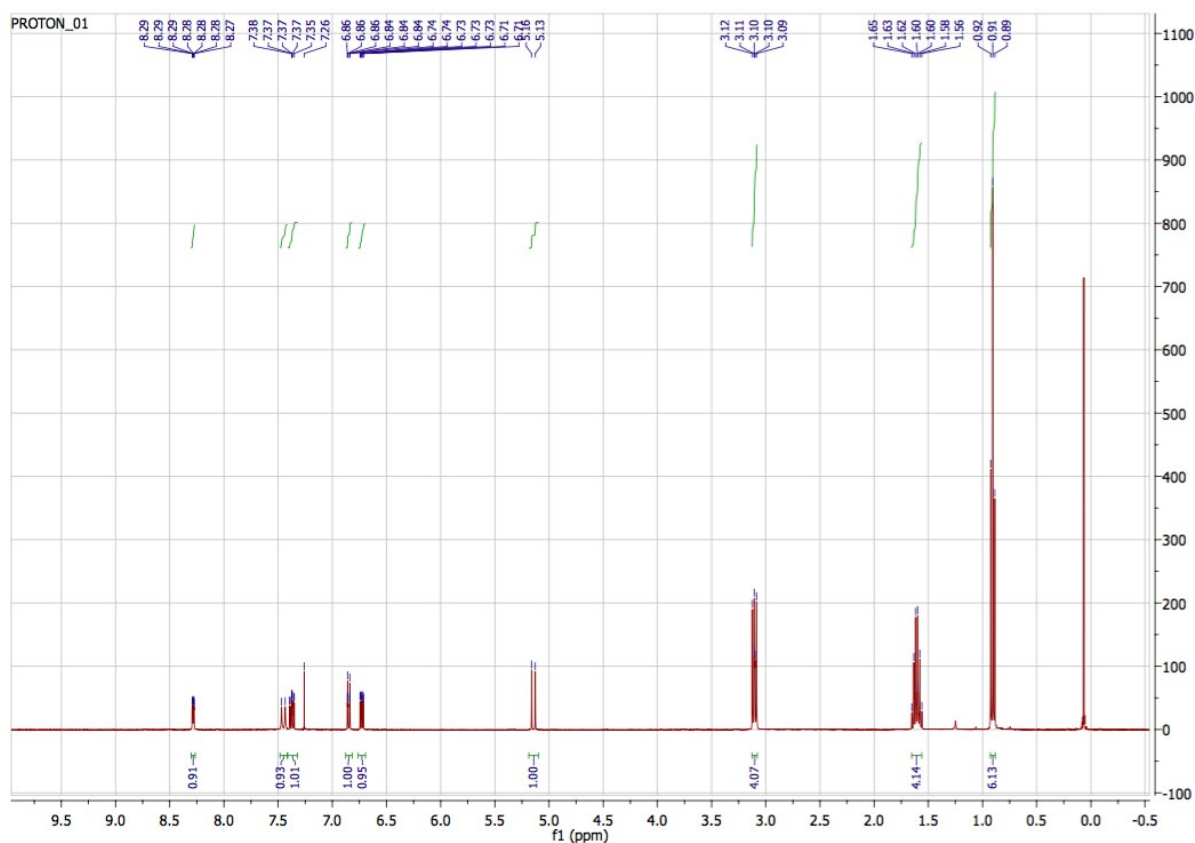

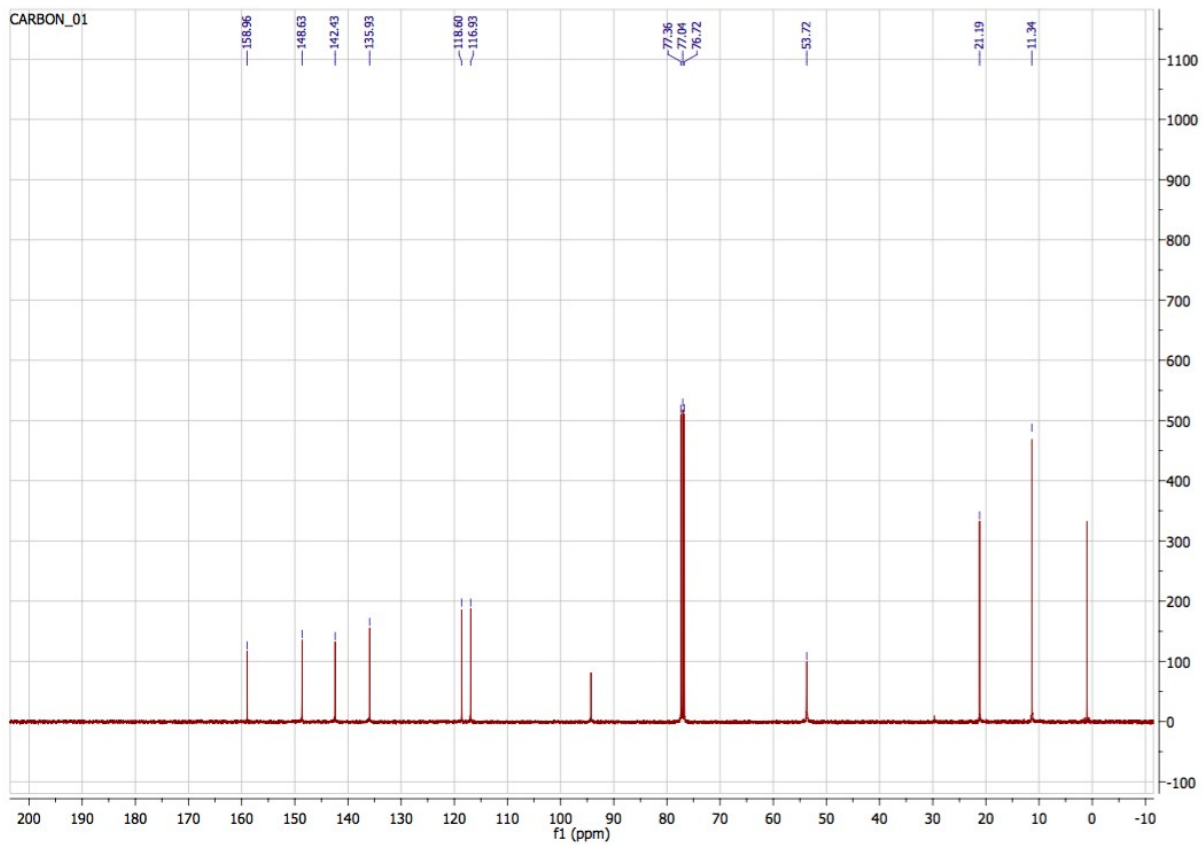

Supplement: c5cc02677f1.pdf [file c5cc02677f1.pdf]
